# Cep55 regulation of PI3K/Akt signaling is required for neocortical development and ciliogenesis

Behnam Rashidieh<sup>1,2</sup>, Belal Shohayeb<sup>3</sup>, Amanda Louise Bain<sup>1</sup>, Patrick R. J. Fortuna<sup>1</sup>, Debottam Sinha<sup>1</sup>, Andrew Burgess<sup>4,5</sup>, Richard Mills<sup>1</sup>, Rachael C. Adams<sup>1</sup>, J. Alejandro Lopez<sup>1,2</sup>, Peter Blumbergs<sup>6</sup>, John Finnie<sup>6</sup>, Murugan Kalimutho<sup>1</sup>, Michael Piper<sup>3</sup>, James Edward Hudson<sup>1</sup>, Dominic Ng<sup>3</sup>, Kum Kum Khanna<sup>1\*</sup>

<sup>1</sup>QIMR Berghofer Medical Research Institute, 300 Herston Road, Herston, QLD 4006, Australia

<sup>2</sup>School of Environment and Sciences, Griffith University, Nathan, QLD 4111, Australia

<sup>3</sup>School of Biomedical Sciences, University of Queensland, St Lucia, Brisbane, QLD, 4072

<sup>4</sup>ANZAC Research Institute, Sydney, NSW 2139, Australia.

<sup>5</sup>Faculty of Medicine and Health, Concord Clinical School, University of Sydney, Sydney, NSW, Australia

<sup>6</sup>Discipline of Anatomy and Pathology, Adelaide Medical School, University of Adelaide, Adelaide SA 5000 Australia

\*Corresponding author: Professor Kum Kum Khanna

QIMR Berghofer Medical Research Institute, 300 Herston Rd, Herston QLD 4006, Australia

**Email:** [KumKum.Khanna@qimrberghofer.edu.au](mailto:KumKum.Khanna@qimrberghofer.edu.au), Tel: +61 7 3362 0338, Fax: +61 7 3362 0105

**Author Contributions:** Conceptualization: BR, ALB, DS, MK, BS, MP and KK; Investigation: BR, BS (Histology), and PF (Organoid); bioinformatics: BR; Supervisory team: ALB, DN, JH, AL and KK; Pathology: JF, PB, MP, APN; data analysis: BR, BS, DS; AB (Mitosis); Writing the original draft, BR, ALB and KK; review and editing: BR, ALB, RA, PF, MP, JF, JH, DN and KK; All authors read and approved the final manuscript.

**Competing Interest Statement:** The authors declare no competing interests.

25 **Abstract**

26 Homozygous nonsense mutations in CEP55 are associated with several congenital malformations that lead to perinatal  
27 lethality suggesting that it plays a critical role in regulation of embryonic development. CEP55 has previously been  
28 studied as a critical regulator of cytokinesis predominantly in transformed cells and its deregulation is linked to  
29 carcinogenesis. However, its molecular functions during embryonic development in mammals have not been clearly  
30 defined. We have generated a Cep55 knockout (Cep55<sup>-/-</sup>) mouse model which demonstrated perinatal lethality  
31 associated with a wide range of neural defects. Focusing our analysis on the neocortex, we show that Cep55<sup>-/-</sup> embryos  
32 exhibited depleted neural stem/progenitor cells in the ventricular zone as a result of significantly increased cellular  
33 apoptosis. Mechanistically, we demonstrated that Cep55-loss downregulates the pGsk3β/β-Catenin/Myc axis in an Akt-  
34 dependent manner. The phenotype was recapitulated using human cerebral organoids and we could rescue the  
35 phenotype by inhibiting active Gsk3β. Additionally, we show that Cep55-loss leads to a significant reduction of ciliated  
36 cells, highlighting its novel role in regulating ciliogenesis. Collectively, our findings demonstrate a critical role of Cep55  
37 during brain development and provide mechanistic insights that may have important implications for genetic syndromes  
38 associated with Cep55-loss.

39

40 **Keywords:** *Cep55 KO mouse model, Perinatal lethality, Neurogenesis, Ciliogenesis, Human brain organoid*

41

42

43

## 44 Introduction

45  
46 Centrosomal protein 55 kDa (CEP55) is a crucial regulator of cytokinesis, the final stage of mitotic cell division[1].  
47 CEP55 is highly upregulated in a wide spectrum of tumors and has been reported to play critical roles in the regulation  
48 of the *PI3K/AKT* pathway, stemness, genomic stability, and cell cycle progression [2,3]. Despite extensive  
49 investigation on the roles of human CEP55 in tumorigenesis, its physiological role during development has remained  
50 largely uncharacterized. Recently, germline mutations of CEP55 in humans have been described in two lethal  
51 *CEP55*-associated syndromes, Meckel-Gruber syndrome (MKS)-like Syndrome[4,5] and MARCH (Multinucleated  
52 neurons, Anhydramnios, Renal dysplasia, cerebral hypoplasia, and Hydranencephaly) [6]. These syndromes exhibit  
53 multiple severe clinical manifestations including several congenital malformations that lead to perinatal lethality.  
54 Homozygous nonsense mutations in *CEP55* that are predicted to lead to loss of protein were identified in affected  
55 fetuses. However, mechanisms underlying complex Cep55-deficient developmental phenotypes remain elusive. We  
56 have generated a Cep55 knockout (KO) mouse model to reveal developmental phenotype and to explore whether it  
57 recapitulates the clinical condition. Additionally, we have used cerebral organoids generated from pluripotent stem  
58 cells as a promising approach to investigate the mechanism of Cep55-associated neurodevelopment phenotype.

59  
60 By generating a mouse model and human cerebral organoids lacking Cep55, here we found that *Cep55* deletion  
61 resulted in a reduction in the size of mouse brains and human cerebral organoids due to excessive apoptosis of  
62 neural progenitor cells (NPC). Additionally, we discovered a critical role for Cep55 in regulating cilia formation.  
63 Mechanistically, we show for the first time that Cep55 regulates neural development through the Akt-downstream  
64 effector, Gsk3 $\beta$ , and its mediators  $\beta$ -Catenin and Myc which are known regulators of neural proliferation and  
65 differentiation [7]. However, Cep55 regulation of ciliogenesis occurs through AKT independent of Gsk3 $\beta$ . Together,  
66 these results illustrate an important role of Cep55 in regulating neurogenesis and ciliogenesis in an Akt dependent  
67 manner in mice.

68  
69

## 70 Results

### 71 Loss of *Cep55* leads to perinatal lethality in mice

72 To investigate the physiological role of CEP55 during development, we generated a KO mouse model of *Cep55*  
73 using the “KO first” allele design wherein the targeted allele acts as a gene-trap to form a non-functional allele (fig.  
74 S1A). Correct targeting was validated independently by genotyping PCR alongside *Cep55* transcript and protein  
75 expression using RT-qPCR and immunoblotting analysis, respectively (fig. S1B-D). To generate the colony of *Cep55*<sup>-/-</sup>  
76 (KO) mice, we intercrossed *Cep55*<sup>+/-</sup> mice, with the expectation that approximately 25% of the offspring would be  
77 of a *Cep55*<sup>-/-</sup> genotype according to Mendelian ratios. Interestingly, after genotyping more than 77 offspring from  
78 these breedings across 19 litters, we could not detect any viable *Cep55*<sup>-/-</sup> mice, indicating that genetic loss of *Cep55*  
79 led to embryonic or perinatal lethality (Sup table 1). To define the time point of lethality, pregnant dams from *Cep55*<sup>+/-</sup>  
80 intercrosses were euthanized at different stages of pregnancy, ranging from E11.5 - E18.5, and embryos collected  
81 for phenotypic evaluation. Interestingly, we were able to obtain viable *Cep55*<sup>-/-</sup> offspring at each gestational stage  
82 (E11.5 -E18.5) except at the time of birth (Sup table 2). Notably, embryos collected at both E14.5 and E18.5 exhibited  
83 significant dwarfism, based on crown-rump length measurements, when compared to control (*Cep55*<sup>+/+</sup>) embryos.  
84 Additionally, *Cep55*<sup>-/-</sup> embryos exhibited an increased thickness of the neck and a flattened head (Fig. 1A, B).  
85

86  
87 To determine if the loss of a single allele of *Cep55* would cause phenotypic changes, we performed the histological  
88 examination of multiple organs from eight-week-old *Cep55*<sup>+/-</sup> mice relative to *Cep55*<sup>+/+</sup> littermates. We observed no  
89 significant differences in the pathohistology or size of respective organs (fig S1E) indicating that loss of a single allele  
90 of *Cep55* does not impact physiological development. Additionally, the monitoring of both genotypes showed no  
91 significant differences in body weight for the first 20 weeks (fig S1F). These data suggest that a single allele of *Cep55*  
92 is largely sufficient to maintain physiological functions.

93  
94 Several recent reports have shown that CEP55 functional loss in humans leads to a range of congenital  
95 abnormalities, all with defective brain development[4–6]. Therefore, we next sought to examine the expression  
96 pattern of *Cep55* using single-cell transcriptomic data of mouse neocortical development[8]. This analysis revealed  
97 that *Cep55* expression levels are highest in the NP cells of E14 embryos (fig S1G). Moreover, investigating human  
98 fetal brain data based on Allen brain atlas revealed that expression of *Cep55* peaks from weeks 8-10 of gestation,  
99 followed by a reduction after 16 weeks, minimal detection between weeks 27-35, and becoming detectable again  
100 three weeks prior to birth[9]. This expression pattern corresponds with the timing of human neurogenesis in the  
101 neocortex through neurogenic divisions and neuronal differentiation from radial glial cells (RGCs)[10]. To validate

102 the expression of *Cep55* during development, we performed  $\beta$ -galactosidase staining in the *Cep55*<sup>+/-</sup> mice, where  
103 the targeted allele contains a LacZ reporter. In the isolated brain of mouse embryos, a gradient of expression of  
104 CEP55 in the neocortex was detected at E12.5, diminishing at E14.5 to become undetectable at E16.5 (fig S1H).  
105 Collectively, our data suggest that *Cep55* plays a critical role during embryogenesis particularly neurogenesis but is  
106 dispensable for adult tissue homeostasis.

107

## 108 ***Cep55* loss causes gross morphological defects in mouse embryos**

109 Given the neurodevelopmental expression pattern of *Cep55*, we predicted significant neural deficits would arise from  
110 *Cep55* loss. To investigate this, we first performed hematoxylin and eosin (H&E) staining of sagittal and coronal  
111 sections of E18.5 embryos of *Cep55*<sup>+/+</sup>, *Cep55*<sup>+/-</sup> and *Cep55*<sup>-/-</sup> mice. We observed no gross morphological differences  
112 in the lung, intestine or liver among the respective genotypes. However, we noted prominent abnormalities in the  
113 brain of *Cep55*<sup>-/-</sup> embryos when compared to respective controls, which were characterized by a partial failure  
114 (hypoplasia) and disorder (dysplasia) of normal structural brain development. The cerebellum was hypoplastic, with  
115 marked thinning of the germinative external-granular layer (EGL) and a diminution and disorganization of neurons  
116 (fig S2A, Right). In addition, the neuronal population of the olfactory bulb was disorganized and depleted (fig  
117 S2A,,Left). Furthermore, coronal sectioning of the brain revealed neocortical depletion of neurons and ventricular  
118 dilatation, as well as smaller germinal regions in both dorsal and ventral telencephalon (fig. S2B). The neocortices  
119 of *Cep55*<sup>-/-</sup> brains were hypoplastic and dysplastic, with diminished and disorganized neurons. In addition to  
120 apoptosis in the neocortex, there were also multifocal areas of cortical necrosis and parenchymal loss, with evidence  
121 of phagocytosis of affected neurons by macrophage-like cells (fig. S2C, upper). Numerous bi-nucleated neurons  
122 were also found in the neocortex of *Cep55*<sup>-/-</sup> (fig. S2C, lower). To measure this defect, we stained mature neurons  
123 with NeuN (RBFOX3) and quantified the number of bi-nucleated neurons in the neocortex of brain. The proportion of  
124 multinucleated neurons immunostained by NeuN in the cortical region of *Cep55*<sup>-/-</sup> mice was increased compared to  
125 that of *Cep55*<sup>+/+</sup> (fig. S2D,E), a phenotype reminiscent of the described changes in human embryos with MARCH  
126 syndrome[6].

127

128 As neurogenesis in neocortical layers peaks at approximately E14.5[11,12] and the highest expression of *Cep55*  
129 was found at this embryonic stage (fig S1H), we chose this gestational stage for characterizing the phenotype and  
130 cellular behavior. Also, to better characterize the specific disruption to neural cells, we focused our investigation on  
131 the neocortex, a well-characterized region of the developing forebrain with prominent CEP55 expression. Strikingly,  
132 brain sizes of *Cep55*<sup>-/-</sup> E14.5 embryos were found to be significantly smaller compared to that of *Cep55*<sup>+/+</sup> by

133 measuring the brain area (Fig. 1C,D). We also found a reduced number of cells in the neocortex of *Cep55*<sup>-/-</sup> embryos.  
134 Furthermore, the size of the ventricle relative to the total brain area was larger and dilated in *Cep55*<sup>-/-</sup> mice, consistent  
135 with our previous histopathology observations. We also observed that the thickness of the cortex was reduced in  
136 *Cep55*<sup>-/-</sup> brains compared to *Cep55*<sup>+/+</sup> (Fig. 1C,D). Similar to our observations at E14.5, we noted fewer cells (DAPI)  
137 in the cortex of *Cep55*<sup>-/-</sup> embryos when compared to *Cep55*<sup>+/+</sup> at E18.5 (Fig. 1E,F). Consistently, the ventricles were  
138 larger and dilated in *Cep55*<sup>-/-</sup> brains and cortex thickness was reduced (Fig. 1E,F ). Also, brain sizes of *Cep55*<sup>-/-</sup>  
139 E18.5 embryos were found to be significantly smaller compared to that of *Cep55*<sup>+/+</sup> (Fig. 1G,H). Interestingly, this  
140 size reduction (*Cep55*<sup>-/-</sup> brain area) likely resulted from decreases in the number of both total cells (DAPI stained)  
141 and neurons (NeuN stained), since the density of the cells (cells/area) after normalization to total brain area was not  
142 significantly different between genotypes (Fig. 1G,H).

143

144 To further investigate the reduction of neurons, we stained brain sections for markers of distinct populations including  
145 NeuN for mature neurons and glial fibrillary acidic protein (GFAP) to mark astrocytes. The mature neurons (NeuN-  
146 positive cells) were reduced in numbers in the neocortex in *Cep55*<sup>-/-</sup> compared to that of *Cep55*<sup>+/+</sup> embryos, even  
147 after normalization to the total cell number as assessed by DAPI staining (Fig. 1G,I). Interestingly, GFAP-positive  
148 cells in the neocortex were reduced in *Cep55*<sup>-/-</sup> embryos when compared to *Cep55*<sup>+/+</sup> (Fig. 1G, J), suggesting  
149 potential defects in the central nervous system development. In the cortical region, GFAP can be a marker of either  
150 astrocytes or the radial-glia-like neuronal stem cells and represents mature radial glia which can be seen in the  
151 medial region (e.g. glial wedge). We also observed a drastic reduction in GFAP-expressing cells at the cortical  
152 midline, neocortex, and whole section in *Cep55*<sup>-/-</sup> brain compared to that of *Cep55*<sup>+/+</sup>. These cells are critical in  
153 facilitating the crossing of axons through the corpus callosum[13]. In line with the lack of GFAP-expressing cells, at  
154 the midline, we observed dysgenesis of the corpus callosum in mutant mice at this age (Fig. 1G). Taken together,  
155 these data show that loss of *Cep55* results in defective neuropathological phenotypes in mice.

156

## 157 **Cep55 regulates the fate of radial glial and intermediate progenitor cells**

158 As we found a reduced number of both neurons and astrocytes, we next sought to determine how *Cep55* regulates  
159 NP differentiation and development during neurogenesis, with a focus on the different neuroepithelial layers of the  
160 neocortex during embryonic development. Neurogenesis in the developing neocortex occurs with the contribution of  
161 two types of NPs: radial glial cells (RGCs) and intermediate progenitor cells (IPCs)[14]. The former produce neurons  
162 and glia which divide at the ventricular zone (VZ; the apical surface), and express the homeodomain transcription  
163 factor, PAX6. The latter, which are derived from radial glial cells, produce only neurons, divide within the basally

164 located subventricular zone (SVZ) and express TBR2, a T-domain transcription factor. The subsequent transition  
165 from IPCs to postmitotic projection neurons (PMN) in the cortical plate (CP) is marked by the onset of TBR1  
166 expression[14]. We next, investigated the different populations of progenitor cells within the nascent cortex, to  
167 determine how a deficit in cortical neuron number might arise. We categorized RGCs as the PAX6<sup>+</sup> TBR2-  
168 population, as some newborn TBR2<sup>+</sup> IPCs retain PAX6 expression transiently[15]. Immunostaining for PAX6, TBR2,  
169 and TBR1 at E14.5 revealed a reduction in the number of RGCs, IPCs, and post-mitotic neurons as a proportion of  
170 the total cortical cell number in *Cep55*<sup>-/-</sup> mice compared to *Cep55*<sup>+/+</sup> (Fig. 2A, B). Accordingly, we also observed a  
171 reduced population of neurons marked by Tuj-1, the neuron-specific class III  $\beta$ -tubulin in *Cep55*<sup>-/-</sup> neocortices  
172 compare to *Cep55*<sup>+/+</sup> (Fig 2C). Next, we investigated how *Cep55* loss impacts mitosis, proliferation, and apoptosis  
173 of NPCs by staining for phosphohistone H3-S10 (pH3), Ki67, and TUNEL, as markers of these cellular processes,  
174 respectively. We found reduced proportion of pH3 positive-cells in *Cep55*<sup>-/-</sup> mice, when pH3-positive cell pool was  
175 normalized to the total number of cells, indicative of either mitotic defects or delayed mitosis/cytokinesis in the  
176 absence of *Cep55* (Fig 2D). Consistently, the proliferation index at E14.5 was significantly reduced in *Cep55*<sup>-/-</sup>  
177 animals (Fig. 2E). Finally, we found high levels of apoptosis as marked by TUNEL staining in *Cep55*<sup>-/-</sup> neocortices  
178 compared to controls at E14.5 when assessed as a percentage of total cell number (Fig 2F). Interestingly, Western  
179 blot analysis of mouse embryonic brain (E14.5) extract also showed upregulation of cleaved caspase-3 in *Cep55*<sup>-/-</sup>  
180 brains consistent with IHC results and histopathological observations (fig S2F). Collectively, these data suggest  
181 that reductions in NPCs are due to elevated levels of cell death and reduced proliferation. Our data indicate a role  
182 for *Cep55* in the survival and viability of neural progenitor populations in neocortical development.

183

## 184 ***Cep55* knockdown induces apoptosis in radial glial cells of human cortical organoid**

185 We next investigated the effect of *CEP55*-loss in human cerebral brain organoids generated from embryonic  
186 pluripotent stem cells (HES3). Cerebral organoids mimic the unique and dynamic features of early human cortical  
187 development in culture, enabling detailed analysis of organ pathogenesis due to particular genetic deregulation or  
188 dysfunction[16].

189 We performed knock-down of *Cep55* in differentiated HES3 organoid cultures using adenoviral GFP-tagged shRNA  
190 against *CEP55* or scrambled control (U6). Knockdown was performed after cerebral organoid induction to circumvent  
191 potential apoptosis caused by *CEP55* loss. Within 24-48 hours of adenoviral transduction, we observed a  
192 significantly increased level of the integrated virus as marked by GFP expression for control CMV-eGFP and sh-  
193 *CEP55* (shRNA U6 scrambled control did not contain a GFP tag) (Fig. 3A). The knock-down of *CEP55* (Fig. 3B) led  
194 to a decrease in the overall size of the transfected organoid, which is in line with the observed microcephaly

195 phenotype (data not shown). Given the extent of apoptosis observed in the mouse model, we characterized the  
196 effect of CEP55 knock-down in the cerebral organoids after 24 hours of infection. A significant reduction of PAX6-  
197 positive NPs was observed within 24 hours of *CEP55* shRNA transduction in organoids compared to control (Fig.  
198 3C, D). However, no significant difference was found in pH3 positive cells (Fig. 3C, E). The reduced number of PAX6  
199 cells was likely caused by a dramatic increase in cell death (cleaved caspase 3) in organoids transduced with *CEP55*  
200 shRNA (Fig. 3F, G). Consequently, we observed a significant decrease in TUJ1 (class III beta-tubulin) positive  
201 neurons between controls and *CEP55*-knockdown organoids (Fig. 3F, H). Collectively, our findings of reduced RGC  
202 numbers from apoptotic cell death in human cerebral organoids are consistent with the *Cep55*<sup>-/-</sup> phenotype observed  
203 in mice.

204

### 205 ***Cep55*<sup>-/-</sup> mice exhibit ciliary abnormalities**

206 The findings presented above using mouse embryos and human cerebral organoids clearly document the role of  
207 *Cep55* in neural development. Notably, nonsense truncating mutations in CEP55 are associated with MKS-like  
208 syndrome, a lethal fetal ciliopathy[4,5]. Primary cilia (cilia, hereafter) perform important functions in  
209 neurodevelopment, are localized to and extend from RGCs into the lateral ventricle, and are also present in other  
210 NPCs and neuron populations[17]. Dysfunction of the ciliary axoneme, basal body, or cilia anchoring structures can  
211 all cause defects in cilia organization, leading to ciliopathies[18]. Next, we investigated the involvement of *Cep55* in  
212 the regulation of ciliogenesis in the developing neocortex at E14.5 (fig S3A) and E18.5 (Fig 4A,B). We performed  
213 immunostaining on the embryonic mouse brain sections from *Cep55*<sup>+/+</sup> and *Cep55*<sup>-/-</sup> mice using Arl13b (a marker of  
214 ciliary membranes),  $\gamma$ -tubulin (basal body), DAPI (DNA marker), and *Cep55* to evaluate and compare their  
215 expression and localization. We observed fewer cilia in the VZ of *Cep55*<sup>-/-</sup> brains at E14.5 and E18.5 compared to  
216 *Cep55*<sup>+/+</sup> brain. Our analysis revealed a decrease in both number and percentage of ciliated cells throughout the  
217 cortical layers at both E14.5 and E18.5, particularly in apical progenitors localized in the ventricle membrane of  
218 *Cep55*<sup>-/-</sup> compared to *Cep55*<sup>+/+</sup> brains (Fig 4A,B and fig S3A). This decrease in ciliated cells in the SVZ was  
219 independent of the reduction of IPCs, as we counted ciliated TBR2<sup>+</sup> cells (fig S3B). Consistently, the ratio of ciliated  
220 RGCs (PAX6<sup>+</sup>) cells decreased significantly in *Cep55*<sup>-/-</sup> compared to control which is indicative of cilia defects  
221 independent of RGC population drop (fig S3B). Given the important role of cilia during neurodevelopment, we further  
222 examined a potential role of *Cep55* in regulation of ciliogenesis in an *in vitro* model.

223

### 224 **CEP55 is localized to the ciliary basal body and regulates cilia growth**



225 Finding the cilia defect in *Cep55*<sup>-/-</sup> brains, we aimed to investigate how *Cep55* regulates ciliogenesis and whether  
226 ciliary defects could be recapitulated in an *in vitro* system to facilitate mechanistic studies. We turned our attention  
227 to a cell line of neural origin, SH-SY5Y[19], and to the hTERT RPE-1 line, which has been routinely used to examine  
228 ciliogenesis[20]. Ciliogenesis usually occurs in G<sub>0</sub> and G<sub>1</sub> and serum starvation is widely used to arrest cells in G<sub>1</sub>  
229 to stimulate cilia formation. We examined the impact of *Cep55* knockdown on cilia formation in SH-SY5Y and RPE-1  
230 cells and found significantly decreased numbers of ciliated cells compared to the respective control; the latter also  
231 revealed a significant reduction in cilia length after *Cep55* knockdown (Fig 4C-F; fig S3C,D). Finally, to facilitate  
232 rescue studies, we isolated mouse embryonic fibroblasts (MEFs) from *Cep55*<sup>+/+</sup> and *Cep55*<sup>-/-</sup> mice to investigate  
233 possible cilia defects and perform rescue experiments with ectopic expression of CEP55 in *Cep55*<sup>-/-</sup> MEFs.  
234 Consistently, we found that *Cep55*<sup>-/-</sup> cells had a significantly reduced number of ciliated cells and shorter cilia when  
235 compared to *Cep55*<sup>+/+</sup> MEFs (Fig. 4G, H). In addition, a slight increase was seen in the number of *Cep55*<sup>-/-</sup> MEFs  
236 displaying multiple small cilia extending from the basal body (double cilia), alongside a significant proportion of cilia  
237 from KO MEFs exhibiting dissociation from the basal body (remnant cilia) (fig S3E). In order to evaluate whether  
238 defective ciliogenesis is a direct consequence of *Cep55* loss, we rescued cilia formation by ectopic overexpression  
239 of *Cep55* in *Cep55*<sup>-/-</sup> MEFs. We showed that ectopic *Cep55* expression (fig S3F) was able to restore cilia formation  
240 and length to levels comparable to *Cep55*<sup>+/+</sup> MEFs (Fig. 4G lower panel, Fig 4H). Given an apparent role for *Cep55*  
241 in ciliogenesis regulation, we also examined whether *Cep55* co-localizes with the cilia axoneme or at the base of  
242 cilia. Co-staining of *Cep55* (yellow) with Arl13b (green) and gamma-tubulin (red) revealed an apparent co-localization  
243 of *Cep55* with gamma-tubulin (a component of the basal body protein complex) in *Cep55*<sup>+/+</sup> or rescue MEFs. To  
244 investigate this, we performed super-resolution microscopy to image *Cep55* (yellow) and  $\gamma$ -tubulin (red) across a  
245 population of *Cep55*-rescued MEFs (ectopic *Cep55* expression) and observed staining of both proteins at the base  
246 of cilia (fig. S3G). Together, these findings illustrate that *Cep55* localizes at the base of cilia, possibly as a component  
247 of the basal body protein complex and is required for normal cilia formation.

248

### 249 ***Cep55*<sup>-/-</sup> MEFs exhibit multinucleation and cell cycle defects**

250 Given that *Cep55*<sup>-/-</sup> embryos are growth restricted *in vivo*, we next sought to recapitulate this phenomenon *in vitro* to  
251 determine if *Cep55* loss causes proliferation defects in our mouse embryonic fibroblast (MEF) cell lines. We  
252 calculated cell doubling time and found significant growth defects in *Cep55*<sup>-/-</sup> lines (fig. S4A) compared to *Cep55*<sup>+/+</sup>,  
253 which was further revealed to be dose-dependent (fig. S4B), thus supporting *in vivo* growth restriction. Moreover, we  
254 were able to rescue this proliferation defect by ectopically expressed *Cep55* in *Cep55*<sup>-/-</sup> MEFs (fig. S4C). Overall, the  
255 *in vitro* proliferation deficiency in *Cep55*<sup>-/-</sup> MEFs was consistent with the observed phenotype in neuronal progenitors,

256 where decreased proliferation was detected with Ki67 (E14.5 ) by immunofluorescence. Furthermore, the  
257 multinucleation seen in MEFs (fig. S4D,E) was reminiscent of the neuronal phenotype. We next performed cell cycle  
258 analysis using propidium iodide (PI)-stained cells sorted by flow cytometry. FACS analysis revealed significant  
259 differences in the cell cycle profile of *Cep55<sup>+/+</sup>* and *Cep55<sup>-/-</sup>* primary MEFs, where *Cep55<sup>-/-</sup>* cells showed enrichment  
260 of cells in G2 and a reduction in G1 population (fig. S4F-H). To further examine cellular division, we performed live-  
261 cell imaging of *Cep55<sup>+/+</sup>* and *Cep55<sup>-/-</sup>* cells transduced with mCherry-histone H2B by EVOS-FL time-lapse  
262 microscopy (fig. S4I). We found extended cell division (mitotic length) in *Cep55<sup>-/-</sup>* compared to *Cep55<sup>+/+</sup>* lines (fig.  
263 S4J). As expected, the *Cep55<sup>-/-</sup>* cells showed defective cytokinesis, taking longer to divide effectively with 17%  
264 remaining multinucleated (fig. S4K). For further characterization of additional mitotic defects, we performed high-  
265 resolution time-lapse microscopy of mCherry-histone H2B cells using Spinning Disk Confocal microscopy to  
266 quantitate mitotic defects including anaphase bridge formation, lagging chromosomes, and mitotic slippage.  
267 Although there was a trend towards an increased proportion of anaphase bridges during mitosis in *Cep55<sup>-/-</sup>* MEFs  
268 compared to control, this was not statistically significant (fig S4L). Moreover, we did not observe any changes in  
269 lagging chromosomes or slippage (fig S4L). Together, these results illustrate that Cep55 is important to support  
270 normal cell growth and division in particular cytokinesis in MEFs.

## 271 272 **Cep55 regulates Gsk3 $\beta$ , downstream of the Akt pathway**

273 Cep55 has previously been shown to regulate PI3K/AKT signaling pathway in cancer cells[2,3], we initially performed  
274 signaling analysis of AKT and its downstream targets in E14.5 mouse brains as well as in MEFs by immunoblotting.  
275 The loss of Cep55 downregulated pAKT in both *Cep55<sup>-/-</sup>* brain tissue and MEFs, consistently (Fig. 5A, B). AKT  
276 controls steady-state levels of GSK3 $\beta$  through phosphorylation of residue Serine 9 (pS9-GSK3 $\beta$ ). Inactive AKT is  
277 known to result in decreased pS9-GSK3 $\beta$  levels, which leads to GSK3 $\beta$  activation with pro-apoptotic functions[21].  
278 In line with this, we observed that *Cep55* loss led to the inactivation of Akt (decreased pS473) and activation of  
279 GSK3 $\beta$  (decreased levels of pS9-GSK3 $\beta$ ) (Fig. 5A, B). Importantly, we were able to rescue the phosphorylation of  
280 Akt and Gsk3 $\beta$  by ectopic expression of *Cep55* in *Cep55<sup>-/-</sup>* MEFs, confirming the specificity of the observed signal  
281 transduction effects (Fig 5C). Activated Gsk3 $\beta$  has been shown to inhibit downstream targets involved in proliferation  
282 such as  $\beta$ -catenin and Myc. We observed a decrease in  $\beta$ -catenin levels in E14.5 *Cep55<sup>-/-</sup>* brains (Fig 5A). Similarly,  
283 we observed reduced  $\beta$ -catenin and non-phospho  $\beta$ -catenin levels in *Cep55<sup>-/-</sup>* MEFs (Fig. 5B). GSK3 $\beta$  can also  
284 destabilize Myc by phosphorylation on Threonine 58[22]. Accordingly, we observed an increase in pT58-Myc levels  
285 and a concomitant decrease in total Myc levels in *Cep55<sup>-/-</sup>* MEFs as well as a trend of decreased total Myc levels in  
286 E14.5 brains when compared to *Cep55<sup>+/+</sup>* controls (Fig. 5A, B). Additionally, we performed IHC staining of total  $\beta$ -

287 catenin and N-Myc on E14.5 brain sections from *Cep55<sup>-/-</sup>* and *Cep55<sup>+/+</sup>* embryos. These results revealed a significant  
288 decline of membranous and cytoplasmic  $\beta$ -catenin in *Cep55<sup>-/-</sup>* in the VZ compared to *Cep55<sup>+/+</sup>* in E14.5 brain,  
289 consistent with immunoblot analysis in the embryonic brain at this time-point (Fig 5D). Similarly, IHC on E14.5 brain  
290 sections revealed a significant reduction in N-MYC expression in *Cep55<sup>-/-</sup>* NPs compared to *Cep55<sup>+/+</sup>* controls (Fig  
291 5E). Notably, *Cep55* loss resulted in a reduction in transcript levels of *Myc* in both brain samples and MEFs,  
292 consistent with reported transcriptional regulation of *Myc* by the Wnt/ $\beta$ -catenin pathway (fig S6A). Additionally, N-  
293 *Myc* (a member of the *Myc* family regulating neural cells) was shown to be reduced in E14.5 *Cep55<sup>-/-</sup>* brain tissue  
294 (fig S5B). Together, we conclude that *Cep55* loss potentially inhibits proliferation and survival in an AKT-dependent  
295 manner.

296

### 297 **Modulating downstream effectors of the PI3K/AKT signaling pathway rescues the** 298 **proliferation and cilia defects induced by *Cep55*-loss**

299 Next, we sought to evaluate whether the reconstitution of Akt signaling or its downstream regulators would be  
300 sufficient to rescue the proliferation and ciliogenesis defects in *Cep55<sup>-/-</sup>* MEFs. To investigate this, we first, utilized a  
301 myristoylated form of AKT1 (myrAKT) previously described to be constitutively-active[23]. *Cep55<sup>-/-</sup>* MEFs were  
302 transduced with retrovirus to express myr-AKT or empty vector (EV) control (fig S5C) and assessed for proliferation.  
303 Incucyte™ analysis revealed that myr-Akt was able to markedly increase the proliferative rate of *Cep55<sup>-/-</sup>* MEFs when  
304 compared to EV-transduced cells (Fig. 6A). We also sought to determine if we could rescue the proliferation and  
305 ciliogenesis defects using an inhibitor of activated GSK3 $\beta$ . The universal GSK3 $\beta$  inhibitor, CHIR99021, at low  
306 dosages (0.1 $\mu$ M and 1  $\mu$ M) was able to partially increase proliferation in *Cep55<sup>-/-</sup>* MEFs (Fig. 6B), possibly through  
307 the inhibition of active GSK3 $\beta$  as per previous reports[24]. In contrast, in *Cep55<sup>+/+</sup>* lines (similar to *Cep55* rescued  
308 lines where GSK3 $\beta$  is inactivated by Akt activity); GSK3 $\beta$  inhibition can hinder proliferation in a dose-dependent  
309 manner (fig S5D). Our findings demonstrate that *Cep55*, through activation of AKT and inhibition of GSK3 $\beta$ , can  
310 regulate proliferation.

311

312 Next, we examined whether myrAKT expression was sufficient to rescue the defects in cilia formation. Strikingly, we  
313 observed that myrAKT expression in *Cep55<sup>-/-</sup>* MEFs but not EV expression restored the percent of ciliated cells to  
314 levels more comparable to *Cep55<sup>+/+</sup>* MEFs (Fig. 6C). Regarding ciliogenesis, inhibition of GSK3 $\beta$  in *Cep55<sup>-/-</sup>* MEFs  
315 at tested concentrations did not affect cilia formation significantly (fig S5E). Our analysis of cilia in CEP55 KD  
316 organoids revealed that CEP55 loss perturbed ciliogenesis (Fig. 6D). However, in accordance with MEFs data, we  
317 were unable to rescue this phenotype with GSK3 $\beta$  inhibitor (Fig. 6D, E ). This is consistent with a previous study that

318 showed that GSK3 $\beta$  inhibition alone does not modulate ciliogenesis but combined inactivation of Von Hippel-Lindau  
319 (VHL) and GSK3 $\beta$  leads to loss of cilia formation and maintenance[25] suggesting that GSK3 $\beta$  acts redundantly with  
320 VHL to regulate ciliogenesis. Strikingly, GSK3 $\beta$  inhibition can rescue the size of human organoids. CEP55 loss in  
321 organoids led to size (area) decrease compared to control, consistent with microcephaly seen in Cep55-null human  
322 patients and mouse model (Fig. 6F). While the CHIR99021 (Gsk3 $\beta$  inhibitor) treatment had no significant effect on  
323 the size of control organoids, it led to a significant increase in the size of CEP55 KD organoids (Fig. 6F). The  
324 mechanism of this rescue is through the reduction of apoptotic cells as marked by cleaved caspase 3 (Fig. 6G).  
325 Taken together, our findings demonstrate that CEP55 regulates cell survival in an AKT-dependent manner (Fig 7).  
326 Nevertheless, Cep55-dependent regulation of ciliogenesis might occur through an AKT downstream effector(s)  
327 independent from GSK3 $\beta$ , Overall, the phenotype in brain organoids and related apoptosis can be rescued through  
328 GSK3 $\beta$  inhibition.

329

330

## Discussion

331  
332

333 CEP55 was initially described as an abscission component serving to regulate cellular segregation during  
334 cytokinesis. Later, the finding of CEP55 regulatory roles in PI3K/AKT survival signaling illustrated the importance of  
335 this protein, especially in cancer where transcriptional upregulation of *CEP55* widely contributes to cancer  
336 progression[2]. Interestingly, activating mutations in genes of PI3K pathway has been shown to cause a wide range  
337 of brain and body overgrowth disorders[26] with phenotypic severity highly dependent on the extent of activation of  
338 the pathway[27]. In contrast, the reduction in the activity of the PI3K pathway in specific organs can lead to decreased  
339 organ size[28]. Recently, four reports linked homozygous nonsense *CEP55* mutations that truncate the protein to  
340 the lethal fetal syndromes, demonstrating the importance of *CEP55* in embryogenesis and especially in neuronal  
341 development[4–6]. Surprisingly, patients compound heterozygotes for nonsense and missense or splicing mutation  
342 in *Cep55* survive[29]. However, to date, the exact molecular mechanism underlying these disorders remained  
343 elusive. By simultaneously studying *Cep55*<sup>-/-</sup> mouse model and human cerebral organoid, our studies provided novel  
344 insights into the pathophysiological role of *Cep55* to understand the disease linked to dysregulation of this gene. The  
345 lethal phenotypes in this model, including the forebrain and hindbrain abnormalities and overall lack of proper  
346 cerebral development overlap with the human disorders. Notably, we also observed a higher proportion of  
347 multinucleated neurons in E14.5 *Cep55*<sup>-/-</sup> brains when compared to controls, mimicking neuron phenotype of CEP55-  
348 associated MARCH syndrome[6]. Consistently, a significant proportion of MEFs exhibited multinucleation upon both  
349 constitutive and conditional loss of *Cep55*.

350

351 The brain size of *Cep55*-deficient embryos is significantly reduced compared to controls due to hypocellularity. It is  
352 conceivable that the apoptosis seen in brain sections could progress to a major loss of cerebral hemisphere  
353 parenchyma, resulting in marked cavitation, leaving only a small amount of residual cortical tissue, and  
354 compensatory expansion of the lateral ventricles (termed hydranencephaly: seen in human with CEP55 mutation),  
355 or porencephaly, if the cystic change and parenchymal loss was less severe. For the detailed characterization of  
356 neurodevelopmental defects upon loss of *Cep55*, in this study, we have concentrated on the development of the  
357 neocortex. Analysis of the overall distribution of neurons across the neocortex revealed a decreased population of  
358 all NPs and neurons in *Cep55*<sup>-/-</sup> brains including RGCs, IPCs, and PMNs. Deficiency in the proliferation of *Cep55*<sup>-/-</sup>  
359 brain cells in the early neurodevelopment stage, as well as the significant increase of apoptosis in both NPs and  
360 PMNs, are likely to be due to the pro-survival role of Akt where its activation is significantly compromised in *Cep55*<sup>-/-</sup>  
361 brain cells. This finding is in line with the time-lapse data showing that cell death is not due to the mitotic catastrophe  
362 caused by aberrant cytokinesis but cells are mainly dying during interphase. Our data suggests proliferation defects

363 associated with loss of Cep55 in both E14.5 embryo brains as well as *in vitro* in MEF models with both constitutive  
364 and conditional Cep55 loss. This proliferation defect could be rescued in *Cep55*<sup>-/-</sup> MEFs by ectopic expression of  
365 *Cep55*. Overall, the *in vitro* proliferation deficiency in *Cep55*<sup>-/-</sup> MEFs was consistent with the observed phenotype in  
366 neuronal progenitors, with decreased proliferation observed by Ki67 immunohistochemistry at E14.5. We also  
367 observed increased levels of cleaved caspase-3, a marker of apoptotic cell death by WB in *Cep55*<sup>-/-</sup> embryonic brain  
368 tissue consistent with increased apoptosis as assessed by TUNEL staining of brain sections by IHC.

369

370 In addition to the pro-survival role of Akt in regulating proliferation and apoptosis, the dysregulation of Akt[30] as well  
371 as its downstream effectors such as GSK3 $\beta$  [31], Myc, and  $\beta$ -Catenin[32] have been reported to have adverse effects  
372 on neurodevelopment, predominantly affecting proliferation. GSK3 $\beta$ , implicated as a master regulator of NPs, is a  
373 central mediator of a wide range of processes in neurodevelopment[33]. Our data showed reduced Akt  
374 phosphorylation and a consequent reduction in inhibitory phosphorylation on Gsk3 $\beta$  in the absence of Cep55 leads  
375 to Gsk3 $\beta$  activation and consequent proteasomal mediated degradation of its substrate,  $\beta$ -catenin. In the *Cep55*<sup>-/-</sup>  
376 brain and MEFs we observed reduced expression of  $\beta$ -catenin by WB and IHC in the absence of any changes at the  
377 level of transcription. We identified Myc destabilization in MEFs and embryonic brain in protein level by WB and  
378 decrease in Myc and N-Myc transcript levels by RT-qPCR. We also validated these results by IHC analysis which  
379 revealed a decline in N-Myc protein expressed mostly in the VZ of mouse brains. Overall, reduced proliferation and  
380 increased apoptosis in NPCs upon Cep55 deletion could explain smaller brain size.

381

382 The function and regulation of Cep55 in the primary cilium have never been studied despite the fact that many  
383 centrosome localized proteins provide a template for ciliogenesis. The ciliogenesis defect observed in *Cep55*<sup>-/-</sup>  
384 depleted cells in this study represents the first example in which multiple pieces of evidence support this notion. First,  
385 *Cep55*<sup>-/-</sup> embryonic brain sections (E14.5) and *Cep55*-depleted human cerebral organoids consistently showed  
386 ciliogenesis defects in NPCs. Moreover, several other cellular models used in the study including *Cep55*<sup>-/-</sup> MEFs and  
387 *Cep55*-depleted RPE-1 and SH-SY5Y cells also exhibited a primary cilium defect. This suggests that Cep55  
388 regulates cilia across different species. This is consistent with the described association of *Cep55* with human MKS  
389 like ciliopathy syndrome[4,5]. Second, we found that *Cep55* is predominantly localized at the base of the primary  
390 cilium, therefore, ensuring appropriate cilium assembly. Third, myr-AKT overexpression is sufficient to restore the  
391 deficit in cilium length and proliferation defect in *Cep55*-deleted MEFs. There is emerging evidence that the cilia  
392 dysfunctions contribute to many neurogenetic disorders such as Meckel-Gruber syndrome[34]. During  
393 neurodevelopment, PI3K/Akt activation is known to mediate the downstream effects of Shh, a regulator of

394 corticogenesis, and the main signaling regulator of cilia[35]. It has been reported that pAkt is localized to the primary  
395 cilia basal body or to a centrosome-like structure in dividing cells; consequently, Akt knockdown can suppress cilia  
396 formation[36]. We propose that defective activation of PI3K/AKT pathway in absence of *Cep55* leads to defective  
397 proliferation and survival of neurons as well as defective cilia formation. However, inhibition of activated Gsk3 $\beta$   
398 observed in *Cep55*<sup>-/-</sup> MEFs and human organoids as a consequence of reduced Akt activation could only rescue the  
399 phenotype through decreasing apoptosis without any impact on ciliogenesis, suggesting that other downstream  
400 effectors of AKT are involved in the regulation of ciliogenesis.

401

402 In summary, our study has used a mouse model as well as human brain organoids to identify the critical role of  
403 *Cep55* during brain development and suggests that defective PI3K/Akt pathway activation and consequently,  
404 increased apoptosis during embryogenesis could be the predominant cause of microcephaly seen in *Cep55* loss-  
405 associated genetic syndromes. In addition, we revealed an important role of *Cep55* in regulating ciliogenesis in an  
406 Akt dependent manner; further studies should determine to what extent disruption of ciliogenesis contributes to  
407 complex *Cep55*-associated clinical phenotypes [4–6].

408

409

## 410 **Materials and Methods**

411

### 412 **Animal husbandry and ethics statement**

413 All experimental animals were maintained on a C57BL/6J strain. For the generation of transgenic mouse see the  
414 supplementary methods. This research was carried out in strict accordance with the Australian Code for the care  
415 and use of animals for scientific purposes. All protocols were approved by the QIMR Berghofer Medical Research  
416 Institute Animal Ethics Committee (ethics number A0707-606M).

417

### 418 **Immunohistochemistry (IHC) and Immunofluorescence (IF).**

419 For IHC, tissues including embryonic brains were collected and fixed in 10% buffered formalin fixative, 4%  
420 Paraformaldehyde or Bouin's solution (Sigma-Aldrich), embedded in paraffin blocks, and 5-10  $\mu$ m-thick sections  
421 were stained with Haematoxylin and eosin or with indicated antibodies. Slides were examined by an independent  
422 veterinary pathologist. Immunohistochemistry staining was performed following standard procedures. Stained slides  
423 were scanned on an Aperio ScanScope FI Slide Scanner (Leica) or imaged on a Zeiss 780-NLO - Confocal  
424 microscope (Zeiss, Jena Germany) and images analyzed using Imaris or ImageJ software. (See the supplementary  
425 methods). Immunofluorescence (IF) assays were performed as previously described<sup>1</sup> (See the extended methods).

426

### 427 **Cerebral brain organoid differentiation**

428 Cerebral brain organoids were generated from HES3 pluripotent cultures were single-cell dissociated using Accutase  
429 as per manufacturer's instructions (Life Technologies). (For detailed procedure see the supplementary methods).

430

### 431 **Cell proliferation assay**

432 Cells were seeded at a density of  $5 \times 10^3$  or  $10^4$  cells per well in duplicate, and growth assessed using an IncuCyte®  
433 S3 Live-Cell Analysis system (Essen BioSciences Inc, USA) Where treatments were performed, drugs were added  
434 the day following cell seeding.

435

### 436 **Immunoblotting**

437 Western blotting was performed as previously described[3]. Protein detection was performed using Super Signal  
438 chemiluminescent ECL-plus (PerkinElmer, Waltham, MA, USA) on a BioRad Gel doc (Bio Rad ChemiDoc Touch,  
439 USA). More details are available in supplementary methods (See the extended methods).

440



## 441 **Quantitative real-time PCR**

442 Reverse Transcription was performed using the SuperScript First-Strand Synthesis System for RT-PCR. This cDNA  
443 was then used as the template for real-time PCR with gene-specific primers as outlined in supplementary methods.

444

## 445 **Statistical analysis**

446 Two-tailed unpaired or paired Student's t-test, one-way or two-way ANOVA with post hoc Bonferroni, log-rank testing  
447 were performed as indicated using Prism v8.0 (Graph Pad Software, La Jolla, CA, USA) and the P-values were  
448 calculated as indicated in the figure legends. Mean and standard error of mean (Mean  $\pm$  SD) are used to describe  
449 the variability within the sample in our analysis. ns;  $P > 0.05$ ; \* $P \leq 0.05$ ; \*\* $P \leq 0.01$ , \*\*\* $P \leq 0.001$ , and \*\*\*\* $P \leq 0.0001$ .

450

## 451 **Acknowledgments**

452

453 We acknowledge the International Knockout Mouse Consortium for providing Cep55 targeted embryonic Stem Cell  
454 Clones (Project ID: 93490), Australian Phenomics Facility (Melbourne) for the generation of knockout mice and  
455 histopathology analysis of embryos, and QIMRB for Animal Facilities, Histology, Flow Cytometry and Microscopy  
456 Facilities, as well as Nigel Waterhouse and Tam Hong Nguyen for their help. We thank Mathew Jones (Diamantina  
457 Institute, UQ) for providing RPE1 cells, Rick Pearson (Peter Mac Callum Cancer Institute, Melbourne) for myrAKT,  
458 and Jill Larson (QIMR Berghofer) for Lenti-Cep55 expression construct. We would like to appreciate Khanna  
459 laboratory members for critical discussions and technical assistance.

460

461

462

## References

463

464

465

466

467

468

469

470

471

472

473

474

475

476

477

478

479

480

481

482

483

484

485

486

487

488

489

490

491

492

493

494

495

496

497

498

499

500

501

502

503

504

505

506

507

508

509

510

511

512

513

514

515

516

517

518

519

520

521

522

523

524

1. Fabbro M, Zhou B-B, Takahashi M, Sarcevic B, Lal P, Graham ME, et al. Cdk1/Erk2-and Plk1-dependent phosphorylation of a centrosome protein, Cep55, is required for its recruitment to midbody and cytokinesis. *Dev Cell*. 2005;9: 477–488.
2. Jeffery J, Sinha D, Srihari S, Kalimutho M, Khanna KK. Beyond cytokinesis: the emerging roles of CEP55 in tumorigenesis. *Oncogene*. 2016;35: 683–690.
3. Kalimutho M, Sinha D, Jeffery J, Nones K, Srihari S, Fernando WC, et al. CEP 55 is a determinant of cell fate during perturbed mitosis in breast cancer. 2018; 1–22. doi:10.15252/emmm.201708566
4. Bondeson M, Ericson K, Gudmundsson S, Ameer A, Pontén F, Wesström J, et al. A nonsense mutation in CEP55 defines a new locus for a Meckel-like syndrome, an autosomal recessive lethal fetal ciliopathy. *Clin Genet*. 2017.
5. Rawlins LE, Jones H, Wenger O, Aye M, Fasham J, Harlalka G V, et al. An Amish founder variant consolidates disruption of CEP55 as a cause of hydranencephaly and renal dysplasia. *Eur J Hum Genet*. 2019. doi:10.1038/s41431-018-0306-0
6. Frosk P, Arts HH, Philippe J, Gunn CS, Brown EL, Chodirker B, et al. A truncating mutation in CEP55 is the likely cause of MARCH, a novel syndrome affecting neuronal mitosis. *J Med Genet*. 2017; jmedgenet-2016.
7. Hur E-M, Zhou F-Q. GSK3 signalling in neural development. *Nat Rev Neurosci*. 2010;11: 539.
8. Loo L, Simon JM, Xing L, McCoy ES, Niehaus JK, Guo J, et al. Single-cell transcriptomic analysis of mouse neocortical development. *Nat Commun*. 2019;10: 134.
9. Shen EH, Overly CC, Jones AR. The Allen Human Brain Atlas: comprehensive gene expression mapping of the human brain. *Trends Neurosci*. 2012;35: 711–714.
10. Vied CM, Freudenberg F, Wang Y, Raposo AASF, Feng D, Nowakowski RS. A multi-resource data integration approach: identification of candidate genes regulating cell proliferation during neocortical development. *Front Neurosci*. 2014;8: 257.
11. Clancy B, Teague-Ross TJ, Nagarajan R. Cross-species analyses of the cortical GABAergic and subplate neural populations. *Front Neuroanat*. 2009;3: 20. doi:10.3389/neuro.05.020.2009
12. Caviness Jr VS. Neocortical histogenesis in normal and reeler mice: a developmental study based upon [3H] thymidine autoradiography. *Dev Brain Res*. 1982;4: 293–302.
13. Mori S, Leblond CP. Electron microscopic features and proliferation of astrocytes in the corpus callosum of the rat. *J Comp Neurol*. 1969;137: 197–225.
14. Englund C. Pax6, Tbr2, and Tbr1 Are Expressed Sequentially by Radial Glia, Intermediate Progenitor Cells, and Postmitotic Neurons in Developing Neocortex. *J Neurosci*. 2005;25: 247–251. doi:10.1523/JNEUROSCI.2899-04.2005
15. Harris L, Zalucki O, Gobius I, McDonald H, Osinki J, Harvey TJ, et al. Transcriptional regulation of intermediate progenitor cell generation during hippocampal development. *Development*. 2016;143: 4620–4630. doi:10.1242/dev.140681
16. Mason JO, Price DJ. Building brains in a dish: prospects for growing cerebral organoids from stem cells. *Neuroscience*. 2016;334: 105–118.
17. Fuchs JL, Schwark HD. Neuronal primary cilia: a review. *Cell Biol Int*. 2004;28: 111–118.
18. Adams M, Smith UM, Logan C V., Johnson CA. Recent advances in the molecular pathology, cell biology and genetics of ciliopathies. *J Med Genet*. 2008;45: 257–267. doi:10.1136/jmg.2007.054999
19. Kovalevich J, Langford D. Considerations for the use of SH-SY5Y neuroblastoma cells in neurobiology. *Neuronal Cell Culture*. Springer; 2013. pp. 9–21.
20. Spalluto C, Wilson DI, Hearn T. Evidence for re-liciation of RPE1 cells in late G1 phase, and ciliary localisation of cyclin B1. *FEBS Open Bio*. 2013;3: 334–340.
21. Maurer U, Preiss F, Brauns-Schubert P, Schlicher L, Charvet C. GSK-3—at the crossroads of cell death and survival. *J Cell Sci*. 2014;127: 1369–1378.
22. Amati B. Myc degradation: dancing with ubiquitin ligases. *Proc Natl Acad Sci*. 2004;101: 8843–8844.
23. Chan KT, Blake S, Zhu H, Kang J, Trigoso AS, Madhamshettiwar PB, et al. A functional genetic screen defines the AKT-induced senescence signaling network. *Cell Death Differ*. 2019.
24. Shakoori A, Mai W, Miyashita K, Yasumoto K, Takahashi Y, Ooi A, et al. Inhibition of GSK-3 $\beta$  activity attenuates proliferation of human colon cancer cells in rodents. *Cancer Sci*. 2007;98: 1388–1393.
25. Thoma CR, Frew IJ, Hoerner CR, Montani M, Moch H, Krek W. pVHL and GSK3 $\beta$  are components of a primary cilium-maintenance signalling network. *Nat Cell Biol*. 2007;9: 588.
26. Keppler-Noreuil KM, Rios JJ, Parker VER, Semple RK, Lindhurst MJ, Sapp JC, et al. PIK3CA-related overgrowth spectrum (PROS): diagnostic and testing eligibility criteria, differential diagnosis, and evaluation. *Am J Med Genet Part A*. 2015;167: 287–295.
27. Roy A, Skibo J, Kalume F, Ni J, Rankin S, Lu Y, et al. Mouse models of human PIK3CA-related brain overgrowth have acutely treatable epilepsy. *Elife*. 2015;4: e12703.
28. Chen WS, Xu P-Z, Gottlob K, Chen M-L, Sokol K, Shiyanova T, et al. Growth retardation and increased apoptosis in mice with homozygous disruption of the Akt1 gene. *Genes Dev*. 2001;15: 2203–2208.
29. Barrie ES, Overwater E, van Haelst MM, Motzack MM, Truxal K V, Crist E, et al. Expanding the spectrum of

- 525 CEP55-associated disease to viable phenotypes. *Am J Med Genet Part A*. 2020;182: 1201–1208.  
526 30. Sittewelle M, Monsoro-Burq AH. AKT signaling displays multifacet functions in Neural Crest development. *Dev*  
527 *Biol*. 2018.  
528 31. Kim W-Y, Wang X, Wu Y, Doble BW, Patel S, Woodgett JR, et al. GSK-3 is a master regulator of neural  
529 progenitor homeostasis. *Nat Neurosci*. 2009;12: 1390.  
530 32. Zechner D, Fujita Y, Hülsken J, Müller T, Walther I, Taketo MM, et al.  $\beta$ -Catenin signals regulate cell growth  
531 and the balance between progenitor cell expansion and differentiation in the nervous system. *Dev Biol*.  
532 2003;258: 406–418.  
533 33. Hur E-M, Zhou F-Q. GSK3 signaling in neural development. *Nat Rev Neurosci*. 2012;11: 539–551.  
534 doi:10.1038/nrn2870.GSK3  
535 34. Hartill V, Szymanska K, Sharif SM, Wheway G, Johnson CA. Meckel–Gruber syndrome: An update on  
536 diagnosis, clinical management, and research advances. *Front Pediatr*. 2017;5: 244.  
537 35. Lai K, Kaspar BK, Gage FH, Schaffer D V. Sonic hedgehog regulates adult neural progenitor proliferation in  
538 vitro and in vivo. *Nat Neurosci*. 2003;6: 21.  
539 36. Suizu F, Hirata N, Kimura K, Edamura T, Tanaka T, Ishigaki S, et al. Phosphorylation-dependent Akt-Inversin  
540 interaction at the basal body of primary cilia. *EMBO J*. 2016/05/24. 2016;35: 1346–1363.  
541 doi:10.15252/embj.201593003  
542  
543  
544

## Figure legends

545  
546

547  
548

### Figure 1. Loss of *Cep55* leads to perinatal lethality and microcephaly in mice.

549 **(A)** Comparison of size (length, mm) and morphology of E14.5 (left) and E18.5 (right) *Cep55*<sup>+/+</sup> and *Cep55*<sup>-/-</sup>  
550 embryos. **(B)** Comparison of the crown-rump length (mm) of E14.5 (left) and E18.5 (right) *Cep55*<sup>+/+</sup> and *Cep55*<sup>-/-</sup>  
551 embryos. Data represent the mean  $\pm$  SD, n = 6–10 embryos per genotype. **(C,E)** Representative images of *Cep55*<sup>+/+</sup>  
552 (left) and *Cep55*<sup>-/-</sup> (right) neocortices (Ncx, yellow box) showing relative size of the the Ncx. The yellow two sided  
553 arrow represents the thickness of the Ncx, green dashed line shows the brain area, white dashed line shows the  
554 ventricle area and the yellow box resembles the analysis area, **(C)** Representative images of *Cep55*<sup>+/+</sup> and *Cep55*<sup>-/-</sup>  
555 mouse brains at E14.5, scale= 50 $\mu$ m. **(D)** Comparison of brain area of *Cep55*<sup>+/+</sup> and *Cep55*<sup>-/-</sup> E14.5 embryonic brains  
556 (left), and quantification of brain cell density (DAPI count within 100 $\mu$ m<sup>2</sup> area of the neocortex) (Middle left)  
557 Quantification of the relative ventricle area ( $\mu$ m<sup>2</sup>; total area shown/total brain area) (Middle right), and Ncx thickness  
558 (right). **(E)** Representative images of *Cep55*<sup>+/+</sup> and *Cep55*<sup>-/-</sup> mouse brains at E18.5, scale= 700 $\mu$ m. **(F)** Comparison  
559 of *Cep55*<sup>+/+</sup> and *Cep55*<sup>-/-</sup> for left: total DAPI+ cell count in the Ncx; middle: relative ventricle area ( $\mu$ m<sup>2</sup>; total ventricular  
560 space/total brain area) and right: Ncx thickness. **(G)** Representative images of whole coronal section (left), boxed  
561 region at increased magnification (middle), and medial region/glial wedge (right) of E18.5 *Cep55*<sup>+/+</sup> (upper) and  
562 *Cep55*<sup>-/-</sup> (lower) embryonic mouse brains. Images show staining for NeuN (neuronal nuclei, mature neurons, red)  
563 and GFAP (Glial fibrillary acidic protein, marks astrocytes and ependymal cells, green). Right panel (glial wedge)  
564 shows the population of mature radial glia. Corpus callosum dysgenesis in *Cep55*<sup>-/-</sup> brain (lower right), the boxed  
565 area in this panel shows GFAP expression in a magnified zone of glial wedge. Scale= 600  $\mu$ m (left), Scale= 100  $\mu$ m  
566 (middle), Scale= 400 $\mu$ m (right). **(H)** Comparison of *Cep55*<sup>+/+</sup> and *Cep55*<sup>-/-</sup> embryonic brain overall cell and neuron  
567 number per section (left), brain area (middle), and cell/neuron density (right). N=4, P<0.0036, 0.0001. **(I)** Comparison  
568 of NeuN-positive neurons normalized to 100 $\mu$ m neocortical area (Ncx) in *Cep55*<sup>+/+</sup> and *Cep55*<sup>-/-</sup> E18.5 embryonic  
569 brains (left) and percentage of NeuN-positive cells across whole brain section normalized to the total number of  
570 cells identified by DAPI fluorescence (right). Data represent mean  $\pm$  SD across two regions from n=4 independent  
571 embryos per genotype. **(J)** Quantification of GFAP-positive cells in the glial wedge of *Cep55*<sup>+/+</sup> and *Cep55*<sup>-/-</sup> E18.5  
572 embryonic brains (left) and GFAP-positive cells in the whole section (right). Data represent mean  $\pm$  SD of four  
573 embryos, N=4, average count of duplicate technical repeats, Student's t-test, \*P < 0.05, \*\*P < 0.01, \*\*\*P < 0.001,  
574 \*\*\*\*P < 0.0001).

575

### Fig 2. *Cep55* regulates cell fate of radial glial and intermediate progenitor cells, and neurons

577 **(A)** Representative images of radial glial cells (RGC; PAX6+) at VZ, intermediate progenitor cells (IPC; TBR2+) at  
578 SVZ and total cells (DAPI) at E14.5, scale = 15  $\mu$ m (upper panel). Quantification of percentage of RGCs (PAX6+)  
579 and IPCs (TBR2+) in *Cep55*<sup>+/+</sup> and *Cep55*<sup>-/-</sup> neocortices (Ncx) at E14.5 (lower). **(B)** Representative images of IPCs  
580 (TBR2+) at SVZ, post-mitotic neurons (TBR1+) at CP and total cells (DAPI, gray) at E14.5, scale = 15  $\mu$ m (upper),  
581 quantification of the percentage of post-mitotic-neurons (TBR1+) in *Cep55*<sup>+/+</sup> and *Cep55*<sup>-/-</sup> neocortices at E14.5  
582 (lower). **(C)** Neuron-specific class III  $\beta$ -tubulin (Tuj1), relative intensity of Tuj1 staining quantified within a 100 $\mu$ m<sup>2</sup>  
583 field of view. **(D)** Phosphohistone H3 (pH3; mitotic cells) in the VZ and SVZ, co-stained with TBR2 to identify  
584 proliferating IPCs at E14.5, scale = 15  $\mu$ m. Quantification of the percentage of total cells expressing pH3 to show the  
585 mitotic index. **(E)** Proliferating cells (Ki67+), IPCs (TBR2+, green) delineating the SVZ, and total cells (DAPI) at

586 E14.5, scale = 15  $\mu\text{m}$  (upper), Comparison of the proportion of Ki67+ cells in *Cep55<sup>+/+</sup>* and *Cep55<sup>-/-</sup>* neocortices to  
587 show proliferation index (lower). **(F)** Apoptotic cells (TUNEL) and total cells (DAPI) in the Ncx, at E14.5, scale = 15  
588  $\mu\text{m}$  (upper), comparison of proportion of apoptotic cells in *Cep55<sup>+/+</sup>* and *Cep55<sup>-/-</sup>* neocortices to show apoptosis index  
589 (lower).

590

### 591 **Fig 3. CEP55 knockdown induces cell death in neural progenitors of human cerebral organoid**

592 **(A)** Day 16 of human iPSC-derived cerebral brain organoids infected with U6 scrambled control (left), CMV GFP  
593 control (middle) and CEP55 knockdown (KD) (right) adenoviral shRNAs with GFP-tag. Expression levels of  
594 integrated viral GFP increased significantly between days 1 to 2 post-infection at a MOI of 10. shRNA U6 scrambled  
595 control did not contain a GFP tag. Upper panel: D0 (infection day) +1; lower panel: D0 +2, scale bars= 50 $\mu\text{m}$ ,  
596 immunofluorescent labeling of cerebral organoids was done after 24 hours of shRNA infection. **(B)** Immunoblot  
597 shows knockdown of CEP55 in adenoviral shRNA against CEP55 transduced organoid compare to U6 scrambled  
598 control. Vinculin = loading control. **(C)** Representative images of labeling for neural progenitor PAX6, mitotic marker  
599 pHH3 and nuclear Hoechst showed a decrease in neural progenitor PAX6 in the CEP55 KD shRNA infected organoids  
600 compared to the U6 and GFP controls. **(D-E)** Quantified immunolabelled organoids (normalized to CMV GFP control)  
601 for **(D)** PAX6 and **(E)** pHH3. **(F)** Representative images of labeling for neural-specific tubulin TUJ1, apoptotic marker  
602 cleaved caspase 3, and nuclear Hoechst showed a clear increase in cell death in the CEP55 KD samples compared  
603 to the controls. **(G-H)** Quantified immunolabelled organoids (normalized to CMV GFP control) for **(G)** Cleaved  
604 Caspase-3 in non Tuj1+ cells **(H)** Total Tuj1+ cells. For all calculations, data represented mean  $\pm$  SD number of  
605 organoids indicated in figures. Non-parametric one-way ANOVA performed; \*\*  $p < 0.01$ , scale = 50  $\mu\text{m}$ .

606

### 607 **Fig 4. Cep55 is localized to basal body of cilia and directly regulates its growth.**

608 **(A)** Super-resolution microscopy of *Cep55<sup>+/+</sup>* and *Cep55<sup>-/-</sup>* mouse neocortex at E18.5 immunostained for cilia  
609 (Arl13b), basal body ( $\gamma$ -tubulin), and DAPI, scale = 10  $\mu\text{m}$ . **(B)** Percent of cilia-positive cells in Ncx at E18.5. **(C-H)**  
610 Representative images showing cilia (Arl13b), basal body ( $\gamma$ -tubulin), *Cep55* (yellow), and DAPI (blue), Scale=5  
611  $\mu\text{m}$ . **(C)** Representative image of cilia and basal body in control (upper) and CEP55 knockdown (lower) in SH-SY5Y  
612 cells. **(D)** Percentage of ciliated cells in Ctrl and KD SH-SY5Y. **(E)** Cilia, basal body, and *Cep55* staining in RPE-1  
613 cells transfected with a control lentiviral vector (Ctrl) (upper), RPE-1 cells with lentiviral knockdown of *Cep55* (lower).  
614 **(F)** Percentage of ciliated cells in RPE-1 cells or *CEP55* knockdown (upper), Scatter plot showing cilia length in RPE-  
615 1 cells or *CEP55* knockdown (lower). **(G)** Representative image of cilia, basal body and *Cep55* in *Cep55<sup>+/+</sup>* (Wt)  
616 MEFs (upper), *Cep55<sup>-/-</sup>* (KO) MEFs (middle), *Cep55<sup>-/-</sup>* MEFs with ectopic expression of Flag-*Cep55* (Rescue) (lower).  
617 **(H)** Percentage of ciliated cells in *Cep55<sup>+/+</sup>*, *Cep55<sup>-/-</sup>* and *Cep55<sup>-/-</sup>* cells reconstituted with a *Cep55* construct (rescue).  
618 Data represent mean  $\pm$  SD of 300 cells per genotype (left); scatter plot showing cilia length ( $\mu\text{m}$ ) in *Cep55<sup>+/+</sup>*, *Cep55<sup>-/-</sup>*  
619 and *Cep55*-reconstituted MEFs. Data were measured in duplicate across two independent experiments (right). For  
620 all calculations, Student's t-test, \* $P < 0.05$ , \*\* $P < 0.01$ , \*\*\* $P < 0.001$ , \*\*\*\* $P < 0.0001$ ).

621

### 622 **Fig 5. Cep55 regulates GSK3 $\beta$ , $\beta$ -Catenin and Myc downstream of the Akt pathway**

623 **(A-C)** Representative image of immunoblot (WB) analysis with indicated antibodies.  $\beta$  actin or vinculin served as a  
624 loading control. WB performed to compare **(A)** *Cep55<sup>+/+</sup>* and *Cep55<sup>-/-</sup>* mouse embryonic brain at E14.5. **(B)** *Cep55<sup>+/+</sup>*  
625 and *Cep55<sup>-/-</sup>* MEFs. **(C)** *Cep55<sup>+/+</sup>* (Wt), *Cep55<sup>-/-</sup>* (KO) and *Cep55<sup>-/-</sup>* MEFs with ectopic expression of *Cep55* (Rescue)

626 with indicated antibodies. **(D)** Representative images of Cep55<sup>+/+</sup> (left) and Cep55<sup>-/-</sup> (right) neocortices stained for  
627  $\beta$ -catenin and nuclei (DAPI) in a 100  $\mu$ m-width box. Bar chart shows the relative intensity of  $\beta$ -catenin signals for  
628 Cep55<sup>+/+</sup> and Cep55<sup>-/-</sup> neocortices; Scale= 50  $\mu$ m. **(E)** Representative images of Cep55<sup>+/+</sup> (left) and Cep55<sup>-/-</sup>  
629 (right) neocortices stained for N-Myc (red), TBR2 positive cells and nuclei (DAPI) in a 100  $\mu$ m-width box. Bar chart  
630 shows the percent of N-Myc positive cells, scale= 15 $\mu$ m (Mean  $\pm$  SD of four embryos duplicate technical repeats,  
631 Student's t-test, \*P < 0.05, \*\*P < 0.01, \*\*\*P < 0.001, \*\*\*\*P < 0.0001).

632

### 633 **Fig 6. Myr-Akt and downstream effectors can rescue Cep55 loss**

634 Proliferation assay showing the growth of Cep55<sup>-/-</sup> (KO) MEF **(A)** Transiently transfected with EV (turquoise blue) or  
635 myr-Akt (purple) and **(B)** treated with indicated doses of GSK3 $\beta$  inhibitor, CHIR99021 (untreated: red, 0.1  $\mu$ M  
636 inhibitor: light green, 1  $\mu$ M inhibitor: dark green). Mean  $\pm$  SD, average of 2 biological repeats and 3 independent  
637 experiments Student's t-test, \*\*\*\*P < 0.0001. **(C)** Representative images of Cep55<sup>-/-</sup> (KO) MEFs reconstituted with  
638 EV-mCherry (left) or myrAKT-mCherry (right) immunostained for cilia (Arl13b), basal body ( $\gamma$ -tubulin) and nuclei  
639 (DAPI). The lower panel shows merged images with magnification of the boxed area. Scale=12  $\mu$ m. Left: Percentage  
640 of ciliated cells in Cep55<sup>+/+</sup> (Wt) and Cep55<sup>-/-</sup> (KO) MEFs transfected with EV or myr-Akt. Mean  $\pm$  SD, n=100 cells  
641 from 3 independent experiments Student's t-test, \*P < 0.05). **(D)** Representative image U6 (shSCR Ctrl) and CEP55  
642 KD human brain organoids immunostained for cilia (Arl13b), basal body ( $\gamma$ -tubulin) and nuclei (DAPI), Scale=10  $\mu$ m.  
643 **(E-G)** Comparison of U6 (shSCR Ctrl) and CEP55 KD untreated (DMSO) and treated with 3 $\mu$ M GSK3 $\beta$  inhibitor,  
644 CHIR99021 for **(E)** Ciliated cell counts. **(F)** The size of organoids (area). **(G)** The percent of cleaved caspase 3 in  
645 PAX6 negative cells. Data were measured across two independent experiments. n=6 organoids. Mean  $\pm$  SD,  
646 Student's t-test, \*\*P < 0.01).

647

### 648 **Fig 7. Graphical abstract**

649 Proposed model of CEP55 regulation of RGC proliferation or apoptosis through PI3K.AKT and the downstream  
650 targets GSK3 $\beta$ ,  $\beta$ -Catenin and MycCEP55 binds to the catalytic subunit of PI3K (p110) and promotes effective  
651 conversion of phosphoinositol (4,5) bisphosphate (PIP2) to PIP3 and downstream phosphorylation of AKT (S473).  
652 The active AKT inactivates GSK3 $\beta$  by phosphorylating it on S9. However, in CEP55 KO, downregulation of AKT  
653 phosphorylation leads to upregulation of the active GSK3 $\beta$  (Y216) under the regulation of Wnt signaling and can  
654 activate apoptosis. Ciliogenesis is regulated in an AKT-dependent manner in a possible crosstalk with Shh and  
655 independent of GSK3 $\beta$ .

656

657  
658  
659  
660

## Supplementary Information

### Supplementary Tables

| P0              | WT     | HET    | KO    | Total |
|-----------------|--------|--------|-------|-------|
| <b>Observed</b> | 34     | 43     | 0     | 77    |
| %               | 44.15% | 55.85% | 0%    |       |
| <b>Expected</b> | 19.25  | 38.5   | 19.25 | 77    |
| %               | 25%    | 50%    | 25%   | 1     |

661  
662  
663  
664

**Table S1.** Proportion of observed and expected offspring from *Cep55<sup>+/-</sup>* x *Cep55<sup>+/-</sup>* intercrosses at time of birth (P=0).

| Embryonic Day | Attempts | WT    | HET   | KO    | Total |
|---------------|----------|-------|-------|-------|-------|
| <b>E11.5</b>  | 1        | 6     | 1     | 3     | 10    |
| %             |          | 60%   | 10%   | 30%   | 100%  |
| <b>E13.5</b>  | 7        | 18    | 20    | 16    | 54    |
| %             |          | 33.3% | 37%   | 29.6% | 100%  |
| <b>E14.5</b>  | 4        | 5     | 17    | 6     | 28    |
| %             |          | 17.9% | 60.7% | 21.4% | 100%  |
| <b>E15.5</b>  | 1        | 3     | 5     | 3     | 11    |
| %             |          | 27.3% | 45.5% | 27.3% | 100%  |
| <b>E16.5</b>  | 3        | 7     | 14    | 4     | 25    |
| %             |          | 28%   | 56%   | 16%   | 100%  |
| <b>E18.5</b>  | 4        | 11    | 14    | 12    | 37    |
| %             |          | 29.7% | 37.8% | 32.4% | 100%  |
| <b>P0</b>     | 2        | 3     | 5     | 0     | 8     |
| %             |          | 37.5% | 62.5% | 0%    | 100%  |
| <b>Total</b>  | 22       | 53    | 76    | 44    | 173   |
| %             |          | 30.6% | 43.9% | 25.5% | 100%  |

665  
666  
667

**Table S2.** Number and percentage of offspring at indicated stages of gestation from *Cep55<sup>+/-</sup>* X *Cep55<sup>+/-</sup>* intercrosses.

## 668 Supplementary figure legends

669

670

### Fig S1.

671

672

673

674

675

676

677

678

679

680

681

682

683

684

685

### Fig S2.

686

687

688

689

690

691

692

693

694

695

696

697

698

699

700

701

702

703

### Fig S3.

704

705

706

707

708

709

710

711

712

713

714

715

716

717

718

719

720

721

722

### Fig S4.

724

725

726

727

728

729

(A) Schematic representation showing Wt (wild type), transgenic (gene trapped), floxed and knockout alleles of murine *Cep55*, blue arrows indicate genotyping primers. (B) PCR genotyping showing *Cep55*<sup>+/+</sup>, *Cep55*<sup>+/-</sup> and *Cep55*<sup>-/-</sup> genotypes. (C) mRNA expression of *Cep55* in *Cep55*<sup>+/+</sup>, *Cep55*<sup>+/-</sup> and *Cep55*<sup>-/-</sup> E14.5 mouse heads. *ACTB* was used as a housekeeping gene for normalization. Data represent the mean ± SD, n = 2 mice per genotype, 3 independent experiments, Student's t-test \*P < 0.05, \*\*P < 0.01, \*\*\*P < 0.001, \*\*\*\*P < 0.0001). (D) Immunoblot analysis of *Cep55* protein expression from *Cep55*<sup>+/+</sup>, *Cep55*<sup>+/-</sup> and *Cep55*<sup>-/-</sup> E14.5 mouse heads. β-actin was used as a loading control. (E) Comparison of organ volumes of 8-week-old *Cep55*<sup>+/+</sup> and *Cep55*<sup>+/-</sup> mice. Brain and thymus size are slightly smaller in *Cep55*<sup>+/-</sup> (Het) mice, n=2 per group. (F) Mean body weights of *Cep55*<sup>+/+</sup> and *Cep55*<sup>+/-</sup> offspring measured at the indicated time points until 20 weeks. n= 6-9 mice per group. (G) *Cep55* expression in the single-cell transcriptomic analysis of mouse neocortical development visualized based on the available data at Zylka lab dataset. The highest expression is seen in radial-glia cells (RG2) at embryonic day 14. (H) β-galactosidase staining of coronal sections of *Cep55*<sup>+/-</sup>-mouse embryonic brain at the indicated time points. Dotted black box indicates the magnified area shown on right, Scale=100 μm.

(A) Cerebellar hypoplasia in *Cep55*<sup>-/-</sup> (lower panel) compared to *Cep55*<sup>+/+</sup> (upper panel) brain sections. Compared to the *Cep55*<sup>+/+</sup>, there is a marked reduction in thickness of the external granular layer (EGL) in a *Cep55*<sup>-/-</sup> brain. The cerebellar cortical neuronal population in *Cep55*<sup>-/-</sup> is deficient and disorganized, higher power views of both cerebellar cortices are also shown (right). The olfactory bulb is also neuron-deficient and disorganized in a *Cep55*<sup>-/-</sup> mouse compared to a *Cep55*<sup>+/+</sup> mouse (left). Scale = 60μm. (B) Comparison of cerebral hemisphere (neocortex (NCx), germinal epithelium (GE) and lateral ventricles) from *Cep55*<sup>+/+</sup> (upper) and *Cep55*<sup>-/-</sup> (lower) E18.5 embryos. Red arrows indicate structural dilation, distortion and disorganization, and necrotic area with neural tissue loss, scale= 200μm. Middle: magnification of boxed area showing depletion of subependymal germinal neuroblasts in *Cep55*<sup>-/-</sup>, scale= 50μm. Right: magnification of boxed area showing neocortical neuronal depletion in cerebral hemispheres and reduction of cortical neuronal population in *Cep55*<sup>-/-</sup>. Red arrow identifies multinucleated neurons. Scale = 20μm. (C) Hematoxylin and eosin staining of E18.5 *Cep55*<sup>-/-</sup> cerebral cortex. Upper: neocortical hypoplasia/dysplasia. Diminished and disorganized neurons with an area of parenchymal necrosis (N, black arrow) and neural tissue loss. Phagocytosed neuronal cellular debris is arrowed and magnified. Scale=120μm. Lower: numerous bi-nucleated neurons (red arrows), scale=180μm. (D) Representative image of NeuN (brown) and Eosin (pink) immunohistochemical staining of E18.5 sections from *Cep55*<sup>+/+</sup> (left) and *Cep55*<sup>-/-</sup> (right) E18.5 embryonic brain sections showing multinucleation, scale = 50μm. (E) Graphical representation of percentage of total cells showing multinucleation. (F) Immunoblotting showing cleaved caspase 3 expression in *Cep55*<sup>+/+</sup> and *Cep55*<sup>-/-</sup> MEFs. β actin was used as a loading control.

(A) Representative image of E14.5 mouse neocortex immunostained for cilia (Arl13b), basal body (γ-tubulin), and DAPI. *Cep55*<sup>+/+</sup> (upper) and *Cep55*<sup>-/-</sup> (lower), Arl13b channel and merged image are shown and *Cep55* signals could not be detected in *Cep55*<sup>-/-</sup> (left), Bar chart shows cilia-positive cells in Ncx in the 100 μm-width box at E14.5, cilia counts normalized to total cell (DAPI) number (lower) at E14.5 (right). (B) Cilia-positive cells in Ncx in the 100 μm-width box at E18.5, quantification of ciliated IPCs (left) and RGCs (right) in the neocortex, expressed as a ratio. Cell numbers were obtained from data shown in FigureS3A and Fig 2A,B (Mean ± SD of four embryos measured in duplicate, Student's t-test, \*P < 0.05, \*\*P < 0.01, \*\*\*P < 0.001, \*\*\*\*P < 0.0001). (C) Representative images of RPE-1 cells transiently transfected with si-Scramble (left panel) or siRNA against *CEP55* for 48 h (right panel) showing cilia (Arl13b) and nuclei (DAPI). Bar chart shows a comparison of percentage of ciliated cells. (D) Immunoblot of *CEP55* expression in Ctrl (Empty vector), or *CEP55*-depleted (shRNA *CEP55*) RPE-1 cells. Vinculin was used as a loading control. (E) Representative images of different phenotypes of cilia in *Cep55*<sup>+/+</sup> and *Cep55*<sup>-/-</sup> MEFs (shortened cilia, double cilia and remnant cilia). Bar charts show percentage ciliated cells, cilia number and percent of cells with remnant cilia or double cilia. (Mean ± SD, n=300 cilia per group of 2 independent experiments. Student's t-test, \*P < 0.05, \*\*P < 0.01, \*\*\*P < 0.001, \*\*\*\*P < 0.0001), scale= 10μm. (F) Immunoblotting showing *Cep55* expression in *Cep55*<sup>+/+</sup>, *Cep55*<sup>-/-</sup> MEFs without or with reconstituted *Cep55* (rescue). Vinculin was used as a loading control. (G) Representative images of individual channels showing cilia (Arl13b,green), basal body (γ-tubulin,red), DAPI (blue) as well as cilia (green) and *Cep55* (yellow) and DAPI (blue) showing the co-localization of *Cep55* and γ-tubulin at the base of cilia. Scale=5 μm.

(A) Doubling time of *Cep55*<sup>+/+</sup> and *Cep55*<sup>-/-</sup> MEFs (Mean ± SD, n=2 biological repeats and 3 independent experiments Student's t-test, \*\*\*\*P < 0.0001). (B-C) Proliferation of (B) *Cep55*<sup>+/+</sup>, *Cep55*<sup>+/-</sup> and *Cep55*<sup>-/-</sup> MEFs and (C) *Cep55*<sup>+/+</sup> (Wt), *Cep55*<sup>-/-</sup> (KO) and *Cep55*-reconstituted (Rescue) MEFs (Mean ± SEM, average of 2 biological repeats and 2 independent experiments Student's t-test, \*\*\*\*P < 0.0001), measured using IncuCyte, Corresponding immunoblotting for *Cep55* expression is shown below each graph. Vinculin was used as a loading control. (D) Representative images of individual channels showing α-tubulin (cytoskeleton), *Cep55*, and nuclei (DAPI) in *Cep55*<sup>+/+</sup> (left) and *Cep55*<sup>-/-</sup> (right)



730 MEFs. **(E)** Bar chart showing percent of multinucleated cells in constitutive MEF (*Cep55<sup>+/+</sup>* (wt), *Cep55<sup>+/-</sup>* (Het) and  
731 *Cep55<sup>-/-</sup>*(KO)), (Mean  $\pm$  SD, n=300 cells counted from 2 biological repeats and 3 independent experiments Student's t-  
732 test, \*P < 0.05, \*\*P < 0.01, \*\*\*P < 0.001). **(F-G)** Modfit histogram of cell cycle analysis by FACS showing cell cycle  
733 distribution of *Cep55<sup>+/+</sup>* **(F)** and *Cep55<sup>-/-</sup>* **(G)** MEFs. **(H)** Graph showing percent of cells in G1, S and G2 for each  
734 genotype. Data represent mean  $\pm$  SD of two lines per genotype, measured in duplicate across three independent  
735 experiments. **(I)** Representative images from time-lapse microscopy of *Cep55<sup>+/+</sup>* (upper panel) and *Cep55<sup>-/-</sup>* (lower  
736 panel) MEFs transfected with mCherry-histone H2B showing different phases of mitosis and cytokinesis. **(J)** Dot plot  
737 showing the time cells take to complete the mitosis (left), the stacked bar chart showing the average time to complete  
738 cell division (right) for *Cep55<sup>+/+</sup>* and *Cep55<sup>-/-</sup>* MEFs. **(K)** Column chart showing the percentage of cells with cytokinesis  
739 failure (multinucleated cells) or success (single cells) for *Cep55<sup>+/+</sup>* and *Cep55<sup>-/-</sup>*, (Mean  $\pm$  SD, n=10-25 cells counted  
740 from 3 technical repeats Student's t-test, \*\*P < 0.01). **(L)** The stacked bar chart represents a comparison of percentages  
741 of different mitotic phenotypes of MEFs transfected with Cherry-histone H2B for *Cep55<sup>+/+</sup>* (left) and *Cep55<sup>-/-</sup>* (right),  
742 based on images of the cell captured by time-lapse microscopy (Spinning disk confocal microscopy). (Mean  $\pm$  SD, n=55-  
743 67 cells counted from 3 technical repeats Student's t-test, \*\*P < 0.01).

744

745

#### Fig S5.

746 **(A-B)** Fold change of mRNA expression of the indicated transcripts for *Cep55<sup>+/+</sup>* and *Cep55<sup>-/-</sup>* E14.5 brain extracts **(A)**  
747 and MEFs **(B)**. **(C)** Immunoblot showing expression of Akt in EV and myrAkt transfected *Cep55<sup>-/-</sup>* MEF. Vinculin was  
748 used as a loading control. Proliferation assay showing growth of **(D)** *Cep55<sup>+/+</sup>* (Wt, left), and Flag-*Cep55* reconstituted  
749 *Cep55<sup>-/-</sup>* MEFs (Rescue, right) treated with indicated doses of GSK3 $\beta$  inhibitor, CHIR99021 (untreated: red, 0.1  $\mu$ M  
750 inhibitor: light green, 1  $\mu$ M inhibitor: dark green), (Mean  $\pm$  SD, average of 2 biological repeats and 2 independent  
751 experiments Student's t-test, \*\*\*\*P < 0.0001). **(E)** Representative images of *Cep55<sup>+/+</sup>*(left) and *Cep55<sup>-/-</sup>* (right) MEFs  
752 untreated (upper) and treated (lower) with 1 $\mu$ M of GSK3 $\beta$  inhibitor, CHIR99021. Bar chart shows the percentage of  
753 ciliated cells in *Cep55<sup>+/+</sup>* and *Cep55<sup>-/-</sup>* MEFs untreated and treated with 1 $\mu$ M of GSK3 $\beta$  inhibitor, CHIR99021, n=100.

754

## 755 **Supplementary Materials**

### 756 **Generation of constitutive and conditional Cep55 knockout mice**

758 Mice were housed at the QIMR Berghofer Medical Research Animal Facility in OptiMICE® caging (Centennial,  
759 Colorado, USA) at 25°C with a 12-hour light-dark cycle. *Cep55* floxed ES cells were purchased from the International  
760 Knockout Mouse Consortium (Exon 6 of *Cep55* was trapped, IKMC Project ID:93490) and heterozygous *Cep55* targeted  
761 (*Cep55*) mice were generated by the Australian Phenomics Network (APN) facility, where the targeted allele acts as a  
762 gene-trap to form a non-functional (KO) allele. The knockout-first allele used in the targeting strategy is amenable to  
763 the generation of a floxed allele via FLP recombinase breeding, allowing the generation of conditional knockout mice.  
764 To obtain *Cep55* cKO mice, *Cep55*<sup>Tg/+</sup> heterozygous mice were crossed with Flpe mice to remove the neo cassette and  
765 backcrossed to wild-type to remove the Flpe transgene. Heterozygous *Cep55*<sup>F/+</sup> mice were intercrossed to obtain  
766 *Cep55*<sup>F/FI</sup> offspring, and crossed to RosaCre<sup>ERT2</sup> transgenic mice to obtain RosaCre<sup>ERT2+</sup>; *Cep55*<sup>F/+</sup> mice.

### 767

### 768 **Genotype analysis**

769 Genotyping was performed using genomic DNA extracted from mouse ear using the QuickExtract™ DNA Extraction  
770 Solution (Lucigen, USA) according to the manufacturer's protocol. Wild-type and *Cep55* transgenic alleles were  
771 genotyped using a 3-primer PCR with a common forward primer (P1) and two different reverse primers (P2 and P3) to  
772 differentiate between different allele forms. Primer sequences were as follows: *Cep55*  
773 P1(TGGGTCTTTAACTCATGGTC), *Cep55* P2(AGGAGTGAAAAGTCCTCACA), *Cep55*  
774 P3(GTACCGCGTCGAGAAGTT), FLPe Fwd (GTGGATCGATCCTACCCCTTGCG), FLPe  
775 Rvs(GGTCCAAGTGCAGCCCAAGCTTCC). Cre F (TGTGGACAGAGGAGCCATAAC ), Cre R  
776 (CATCACTCGTTGCATCGACC).

### 777

### 778 **qRT PCR**

779 The cDNA was then used as the template for real-time PCR with gene-specific primers. A control reaction was  
780 performed without reverse transcriptase to ensure no genomic DNA had contaminated the samples, as well as a no-  
781 template DNA control. The qRT-PCR was performed in 96-well plate format using a SYBR Green master-mix (Roche  
782 Applied Science, Basel, Switzerland) with a CFX96 Touch Real-Time PCR Detection System (Bio-Rad Laboratories,  
783 US). The total volume of each reaction was 8 µL including 4 µL of Sybr green, 1 µL of each primer (1 picomole of  
784 each), 1µL of cDNA (10ng) and 2 µL of sterile water. The specificity of qRT PCR amplification was examined by  
785 checking the melting curves and running each sample on a 2 % agarose gel. The results were analyzed by the  $\Delta\Delta C_t$   
786 method. Actin was used as a housekeeping gene.

787

## 788 **qRT PCR primers**

789 *Myc* (CGGACACACAACGTCTTGAA / AGGATGTAGGCGGTGGCTTTT),

790 *Mycn* (CCTCCGGAGAGGATACCTTG / TCTCTACGGTGACCACATCG),

791 *Cep55* (CCTAGTAGCTCCAAGTCAGAC / ACCTTAGGTGGTCTTTGAGTC)

792

## 793 **Organ/embryo isolation**

794 Mouse organs were isolated using the Nikon SMZ45 stereo dissecting microscope (Nikon Inc, Tokyo, Japan). The  
795 isolated organs were washed in ice-cold Phosphate Buffered Saline (PBS). For protein or mRNA extraction, the samples  
796 were snap-frozen on dry ice. For histology staining, tissues were fixed in either the Bouin solution (pathology  
797 investigation) or 4% PFA (immunohistochemical staining) for 24-48 hours.

798

## 799 **MEF establishment**

800 MEFs were isolated from E13.5 embryos from *Cep55*<sup>+/-</sup> inter-crosses for the constitutive MEF and *Cep55*<sup>fl/+</sup> Cre<sup>ERT2</sup> X  
801 *Cep55*<sup>fl/fl</sup> crosses for conditional MEFs. Embryos were dissected into ice-cold sterile PBS, followed by removal of the  
802 internal viscera and head for genotyping. The remaining tissue was incubated in trypsin-EDTA (Sigma Aldrich®, St  
803 Louis, USA) and disaggregated by mechanical shearing using a sterile scalpel blade. The dispersed tissues were further  
804 homogenized by trituration and transferred into 25cm<sup>2</sup> flasks (Corning®) and allowed to adhere overnight. Primary  
805 MEFs were maintained in Dulbecco's Modified Eagle's Medium (DMEM) (Life Technologies TM, Carlsbad, CA, USA)  
806 containing 20% Fetal Bovine Serum (SAFC BiosciencesTM, Lenexa, USA) 1% penicillin-streptomycin (Life  
807 Technologies) and 1% Amphotericin B. Primary MEFs prior to passage 5 were used for experiments as indicated.  
808 Retroviral SV40 transfection was used for the immortalization of MEFs.

809

## 810 **Cell culture**

811 Mouse embryonic fibroblasts (MEFs) were generated as per extended methods. Retinal Pigment Epithelium (RPE-1)  
812 cells were obtained from the Diamantina Institute, UQ. Human neuroblastoma (SH-SY5Y) cell line was cultured in a 1:1  
813 mix of DMEM and F-12 supplemented with NEAA (1%, non-essential amino acids), FCS (10%) and pen/strep (100  
814 U/ml). Pluripotent stem cell line HES3 (WiCell) was maintained in mTeSR1 media (StemCell Technologies) and  
815 passaged every 4 days using ReLeSR™ as per manufacturer's instructions (StemCell Technologies) and reseeded at  
816 12,000 cells per cm<sup>2</sup> onto T25 cell culture flasks coated with Matrigel (Corning). All the cell lines were routinely tested  
817 for Mycoplasma infection by Scientific Services at QIMR Berghofer Medical Research Institute.

818

## 819 **Cerebral brain organoid differentiation**

820 Single-cell suspensions were counted and seeded at  $10^4$  cells per well of U bottom 96 well ultra-low attachment  
821 plates (Corning) in mTeSR1 media supplemented with  $10\mu\text{M}$  ROCK inhibitor and centrifuged at 300g for 3 minutes  
822 to allow for initial aggregation. The following day, media in each well was replaced with knockout serum replacement  
823 (KSR) media, with ingredients from Life Technologies (USA) consisting of DMEM/F12, 20% KSR, 1x  
824 Penicillin/Streptomycin, 1x Glutamax, 1x Non-essential amino acids and  $0.1\text{mM}$   $\beta$ -mercaptoethanol. KSR media was  
825 supplemented with  $2\mu\text{M}$  Dorsomorphin and A83-01 (Sigma-Aldrich) and changed daily for the first 5 days of  
826 induction. Between days 5 and 6 of induction, media was changed at a 1:1 ratio with neural induction media  
827 consisting of DMEM/F12, 1x N2, 1x Glutamax, 1x Non-essential amino acids, 1x Penicillin/Streptomycin and  
828  $10\mu\text{g/mL}$  Heparin (Stem Cell Technologies) supplemented with  $1\mu\text{M}$  CHIR99021 and SB-431542 (Sigma-Aldrich).  
829 At day 7, media changes consisted only of neural induction media supplemented with  $1\mu\text{M}$  CHIR99021 and SB-  
830 431542 until day 14, at which point cultures were changed to neural differentiation media consisting of 1:1 base  
831 media of DMEM/F12 and Neurobasal, 1x Glutamax, 1x Non-essential amino acids, 1x N2 and B27 (with vitamin A)  
832 supplements, 1x Penicillin/Streptomycin,  $0.05\text{mM}$   $\beta$ -mercaptoethanol and  $2.5\mu\text{g/ml}$  insulin (Life Technologies).

833

## 834 **Adenoviral shRNA infections**

835 Cerebral brain organoids were infected with adenoviral shRNA viruses as per manufacturer's instructions (Vector  
836 Biolabs). Two control and CEP55 adenoviral shRNAs were used: scrambled control Ad-U6-RNAi (cat# 1640), CMV  
837 driven Ad-GFP control (cat# 1060) and human CEP55 shRNA silencing adenovirus (cat# shADV-204994). Day 16  
838 cerebral organoids were infected with the control and CEP55 adenoviral shRNAs at a MOI of 10. Organoids were  
839 harvested 24- and 48-hours post-infection to characterize knockdown of CEP55. (For transfection of other genes  
840 and transduction see the extended methods).

841

## 842 **Doubling time assay**

843 MEFs were plated in a 10 cm petri dish, at a density of  $10^5$  cells per well, in triplicate for each genotype. Every  
844 second day, cells were collected, and the overall cell number assessed using a Countess® automated cell counter  
845 (Life Technologies) for a total of 6 days.

846

## 847 **Cell cycle analysis**

848 Cells were plated in a 6-well plate in duplicate at a density of  $10^5$  cells per well and harvested in trypsin-EDTA (Sigma  
849 Aldrich®, St Louis, USA) at indicated time points and fixed in ice-cold Ethanol for 24h. Cells were stained in 1mg/mL  
850 of propidium iodide (Sigma Aldrich®) and 15mg/mL RNase A) at 37°C in the dark. DNA content was assessed using  
851 a FACScanto II flow cytometry (BD Biosciences, Mountain View, CA). The proportion of cells in G0/G1, S phase and  
852 G2/M were quantified using ModFit LT™ 4.0 software (Verity Software House, Topsham, ME, USA).

### 853 **Live-cell imaging and microscopy**

854 Live-cell imaging was performed on an EVOS FI Auto (ThermoScientific) or Spinning disk confocal (Andor)  
855 microscope using MetaMorph® Microscopy automation and image analysis software. Images were analyzed using  
856 analySIS LS Research, version 2.2 (Applied Precision).

857

### 858 **Immunofluorescence**

859 For immunofluorescence (IF) assays, cells were counted and seeded at  $5 \times 10^4$  cells on sterile glass coverslips. For  
860 assessing cilia, MEFs were serum-starved for 48 h prior to analysis. Where indicated, drugs were added 12-24 h  
861 prior to fixation. Cells were fixed in 4% PFA (Sigma Aldrich®, St Louis, USA) or ice-cold Methanol (100%) for the  
862 centrosomal protein in PBS for 20 minutes at RT and permeabilized in 0.1% TritonX-100 (Sigma Aldrich®) for 10  
863 minutes or 90 seconds (cilia experiments) and blocked in 3% or 1% (cilia experiments) bovine serum albumin (BSA;  
864 Sigma Aldrich®) in PBS for 1 hour in a humidified chamber at RT. Coverslips were washed and incubated with Alexa-  
865 fluor-conjugated secondary antibodies (Sigma Aldrich®) diluted in 3 or 1% BSA (1:1000) for 30 minutes at 37°C in  
866 a humidified chamber in the dark. Coverslips were mounted using Prolong® gold anti-fade mounting medium (Life  
867 Technology™). Imaging was performed on a DeltaVision personal DV deconvolution microscope and DeltaVision™  
868 Ultra (super-resolution) (Applied Precision, GE Healthcare, Issaquah, WA) and analyzed using the GE DeltaVision  
869 software package. Automated counting was performed using script modules of Fiji ImageJ software (Java3D,  
870 Minnesota, USA).

871

### 872 **Whole-mount immunostaining**

873 Brain organoids were stained following a previously published protocol<sup>38</sup>. Briefly, organoids were fixed in 1%  
874 paraformaldehyde solution overnight at 4°C. After washing, organoids were incubated for 4 hours at room  
875 temperature in a blocking buffer consisting of 5% FBS and 0.2% TritonX in PBS. Organoids were incubated with  
876 primary antibodies (extended methods) in blocking buffer overnight at 4°C, followed by washing in blocking buffer  
877 and subsequently incubated with secondary antibodies and Hoechst (1:1000) overnight at 4°C. Organoids were  
878 again washed twice in blocking buffer at 4°C and subsequently mounted onto microscope slides using Prolong glass

879 antifade mountant (Life technologies). Live imaging was carried out using an Andor WD Revolution spinning disk  
880 microscope to assess an increase in integrated viral GFP. Immunostained samples were imaged using a Zeiss 780-  
881 NLO confocal microscope. Four random fields of view were imaged per organoid and manually quantified using Fiji  
882 software.

883

#### 884 **$\beta$ -Galactosidase staining**

885 Detection of  $\beta$ -Galactosidase Activity using LacZ reporter and X-gal Staining was performed as described by (Burn,  
886 2012). X-gal (5-Bromo-4-chloro-3-indoxyl-beta-D-galactopyranoside, GoldBio) was used to detect reporter gene  
887 expression marked by a dark blue stain. Briefly, whole embryos/organs were dissected and fixed (4% PFA for 30  
888 minutes) following by washing (three times with wash buffer (0.02% NP-40, 0.01% deoxycholate in PBS) and  
889 chromogenic staining with staining solution (5 mM K<sub>3</sub>Fe(CN)<sub>6</sub>, 5 mM K<sub>4</sub>Fe(CN)<sub>6</sub>, 0.02% NP-40, 0.01% deoxycholate,  
890 2 mM MgCl<sub>2</sub>, 5 mM EGTA, 1 mg/mL X-gal in PBS) in the dark at 37°C overnight.

891

#### 892 **Neurohistopathological analysis and immunohistochemistry staining**

893 For histopathologic investigation with hematoxylin and eosin (H&E), tissues were collected and fixed Bouin's solution  
894 (Sigma-Aldrich, USA) for 48 h and embedded in paraffin blocks. 5  $\mu$ m-thick sections were prepared for H&E staining  
895 with a Leica Autostainer XL. For periodic acid-Schiff (PAS) staining, whole testes were removed from male mice and  
896 fixed in 4% PFA for 24-48 h. Tissues were embedded in paraffin and Wax embedded tissues were sectioned at 5-10  
897  $\mu$ m and mounted onto Superfrost Plus slides (Thermo Fisher Scientific) using the Sakura Tissue-Tek® TEC™ (Sakura  
898 Finetek, Tokyo, Japan). The slides were then later dewaxed and rehydrated by standard protocols.

899 Antigen retrieval was performed with 10 mM Sodium citrate buffer pH=6.0 using a Decloaking Chamber™ NxGen  
900 (Biocare Medical, USA) for 15 min at 95°C. Sections were permeabilized and blocked in blocking buffer at RT for at  
901 least 1 h (20% FBS / 2% BSA / 0.2% TritonX in PBS. Primary antibodies were diluted in blocking buffer and incubated  
902 at 4°C overnight in a humidified chamber. Alexa-fluor-conjugated (Life Technology) secondary antibodies were  
903 incubated at RT for 3 hrs in a humidified chamber. Slides were mounted with Vectashield (Vector Laboratories,  
904 Burlingame, CA, USA) followed by cover-slipping using a Leica CV5030 (Leica Biosystems, Wetzlar, Germany) glass  
905 coverslipper and Shandon Consul-Mount mounting media (Life Technology™). Slides were scanned with Aperio®  
906 Scanscope® FL/XT (Aperio®, Vista, USA) using 20X or 40X magnification and imaged with an LSM780 confocal  
907 microscope (Zeiss, Jena Germany) before analyzing with Image Scope software (Leica Biosystems, Buffalo Grove, IL,  
908 USA). Nuclei count v9 algorithm or Imaris (Bitplane Scientific Software, Belfast, United Kingdom) was used to score  
909 immunopositive cells.

910

## 911 **Immunostaining antibodies**

912 Immunostaining was performed with the following primary antibodies: Ki67 1:500 (rabbit, NCL-ki67p; Novacastra,  
913 Wetzlar, Germany); mouse anti  $\gamma$ -tubulin (1:400, T5326 Sigma), rabbit anti  $\gamma$ -tubulin (1:400, T5192 Sigma), rabbit anti  
914 Arl13b (1:300, 17711-1-AP Proteintech), mouse anti  $\alpha$ -tubulin (1:300, T5168 Sigma), mouse anti Arl13b (1:300, 75287,  
915 Antibodies Inc.), rabbit anti TBR1 (1:200, ab31940 Abcam), Monoclonal Anti-Acetylated Tubulin antibody produced in  
916 mouse clone 6-11B-1(Sigma Aldrich®) , rat anti TBR2 488 (1:200, 53-4875-80 eBioscience), rabbit anti phospho-  
917 histone3 (1:300, ab47297 Abcam), mouse anti PAX6 (1:200, DSBH), Cep55 (1:500; sc-374051Santa Cruz  
918 biotechnology), Pericentrin (1:1000; Covance, PRB-432C),  $\beta$ -Catenin (1:1000; Cell Signaling Technology, 9582),  
919 Cleaved Caspase-3 (1:500; 9664 Cell Signaling Technology), Tuj1 (TU20) (1:200, 4466s Cell Signaling Technology),  
920 GFP (1:500, AB290 Abcam), DAPI was used for the nuclear staining (D9564; MilliporeSigma). ApopTag staining was  
921 performed with an ApopTag peroxidase in situ apoptosis detection kit (S7100; MilliporeSigma, Billerica, MA, USA).

922

## 923 **Gene transduction and transfection**

924 For the generation of stable and constitutive cell lines with overexpression or knockdown of Cep55, we used Flag-  
925 Cep55 cloned into the pLenti PGK Hygro Dest vector (addgene#19066), or mouse small-hairpin RNAs (shRNAs) in the  
926 pLKO plasmid (Sigma Aldrich®, St Louis, USA). Cells were transduced by spinfection for 1 h in the presence of  
927 Hexadimethrine bromide (Polybrene) (Sigma Aldrich®, St Louis, USA) and media collected and filtered at 48 h and 72  
928 h post-transfection. For human cell lines, constitutive CEP55-knockdown was performed as previously described<sup>1</sup>. The  
929 Selection of clones was performed using 400  $\mu$ g/mL Hygromycin, 50  $\mu$ g/mL Zeocin, 5  $\mu$ g/mL Blastocystin (Life  
930 Technology™) or 5  $\mu$ g/mL of Puromycin (Life Technology™). Transient Cep55 silencing was performed by reverse  
931 transfection using 10-20 nM of individual small interfering RNAs (siRNAs manufactured by Shanghai Gene Pharma,  
932 China) and Lipofectamine RNAiMAX (Life Technologies™) for 48 h.

933

## 934 **Retrovirus and lentivirus packaging and transduction**

935 For the production of retrovirus or lentivirus, Phoenix Amphotropic (retrovirus) or Hek293T cells (lentivirus) were plated  
936 at 90 % confluency in a T75 flask and transfected with 5  $\mu$ g of DNA and 15  $\mu$ L Polyethylenimine or PEI (Polysciences,  
937 Inc., 23966-2, POL) (1:3 ratio) in Optimum media. At 5 h post-transfection, media was changed and the packaging cells  
938 incubated for 72 h. At 48 h and 72 h post-transfection, the media was filtered using a 0.45  $\mu$ m filter onto target cells  
939 prior to spinfection (at 1000 X g for 1 h at 25° C) in the presence of hexadimethrine bromide (polybrene; Sigma Aldrich®,  
940 H9268-5G). Media was removed after spinfection and cells were allowed to recover for the next 48 h before selection

941 with the corresponding antibiotic was carried out to select for transduced cells. Antibiotic selection was sustained until  
942 an untransduced control plate of cells had all died.

943

#### 944 **Sequences**

945 (5'-3') Cep55\_Scr (CCGGCGCTGTTCTAATGACTAGCATCTCGAGATGCTAGTCATT AGAACAGCGTTTTTTT);  
946 Cep55\_sh#2 (CCGGCAGCGAGAGGCCTACGTAAACTCG AGTTTAACGTAGGCCTCTCGCTGTTTTTTG);  
947 Cep55\_sh#4 (CCGGGAAGATTGAATC AGAAGGTTACTCGAGTAACCTTCTGATTCAATCTTCTTTTTT); SiRNA  
948 (Cep55\_Scr Sense (5'-3'): CAAUGUUGAUUUGGUGUCUGCA ) and anti-sense (5'-3') : UGA AU AGGAUUGUAAC);  
949 SiRNA Cep55\_SEQ1 Sense (5'-3'): CCAUCACAGAGCAGCC AUUCCCACT and anti-sense (5'-3') :  
950 AGUGGGAAUGGCUGCUCUGUGAUG GUA)

951

#### 952 **Cell and tissue lysate preparation**

953 For preparation of tissue lysate, the organs were diced using a sterile scalpel blade followed by lysis in RIPA buffer  
954 (25mM Tris-HCl (pH 7.6), 150mM NaCl, 1% NP40, 1% Sodium deoxycholate and 0.1% SDS) or Urea lysis buffer (8M  
955 urea, 1% SDS, 100mM NaCl, 10mM Tris) and the samples were sonicated for 10 seconds on a Branson Sonifier 450  
956 (Branson Ultrasonic Corporation, Danbury, CT, USA). Cell debris was removed by centrifugation at 13,000 RPM at 4°C  
957 for 30 minutes. Protein concentration was determined using a Pierce BCA Protein Assay Kit with Bio-Rad Protein Assay  
958 Dye Reagent (Thermo-Scientific). 30 or 60 µg of protein was resuspended in 1X laemmli buffer and samples heated to  
959 95°C for 5 minutes prior to electrophoresis.

960

#### 961 **Western blot**

962 Polyacrylamide gels were cast as previously described<sup>88</sup>. Prepared protein samples were subjected to electrophoresed  
963 at 120 V using the Bio-Rad Mini-PROTEAN® Tetra system in SDS running buffer (25 mM Tris-HCl, 192 mM glycine,  
964 0.1 % SDS (v/v)). Gel transfer was performed using the Invitrogen X-cell SureLock™ transfer system at 80 V for 90  
965 minutes in 1X transfer buffer (50 mM Tris, 40 mM Glycine, 20 % methanol) onto Amersham Hybond nitrocellulose  
966 membrane (GE Healthcare, Waukesha, WI, USA), and transfer efficiency assessed by Ponceau S staining (0.1 % (w/v)  
967 Ponceau S in 5 % acetic acid). Membranes were blocked in blocking buffer (5 % Skim milk powder (Diploma Brand) in  
968 PBS containing 0.5 % Tween-20- PBS-T) for 1 h on a shaker at RT followed by overnight incubation with primary  
969 antibodies at 4° C. The membranes were washed (3x PBS-T) and incubated in secondary antibodies for 1 h. Protein  
970 detection was performed using Super Signal chemiluminescent ECL-plus (PerkinElmer, Waltham, MA, USA) on a  
971 BioRad Gel doc ( Bio-Rad ChemiDoc Touch, USA)



972

973 **Western blot antibodies**

974 Cep55 (1:1000, In house raised in rabbit against murine Cep55 (amino acids 55-250), Vinculin (1:2000; 13901 Cell  
975 Signaling Technology),  $\beta$ -Actin (1:2000, 612656 BD Pharmingen),  $\beta$ -Catenin (1:1000, 9582 Cell Signaling Technology),  
976 GSK 3 $\beta$  ( 1:1000, 9369 Cell Signaling Technology ), pGSK 3 $\beta$ (Ser9) (1:1000, 9322 Cell Signaling Technology), Cleaved  
977 Caspase-3 (1:500, 9664 Cell Signaling Technology), pAKTs473 ( 1:1000, 4060 Cell Signaling Technology), AKT  
978 (1:1000, 9271 Cell Signaling Technology), p Myc (T58) (1:1000, ab28842 Abcam), Non-phospho (Active)  $\beta$ -Catenin  
979 (Ser33/37/Thr41) (1:1000, 8814 Cell Signaling Technology), MYC (Y69) (1:1000, Ab32072Abcam ).

980

981

982

983

984

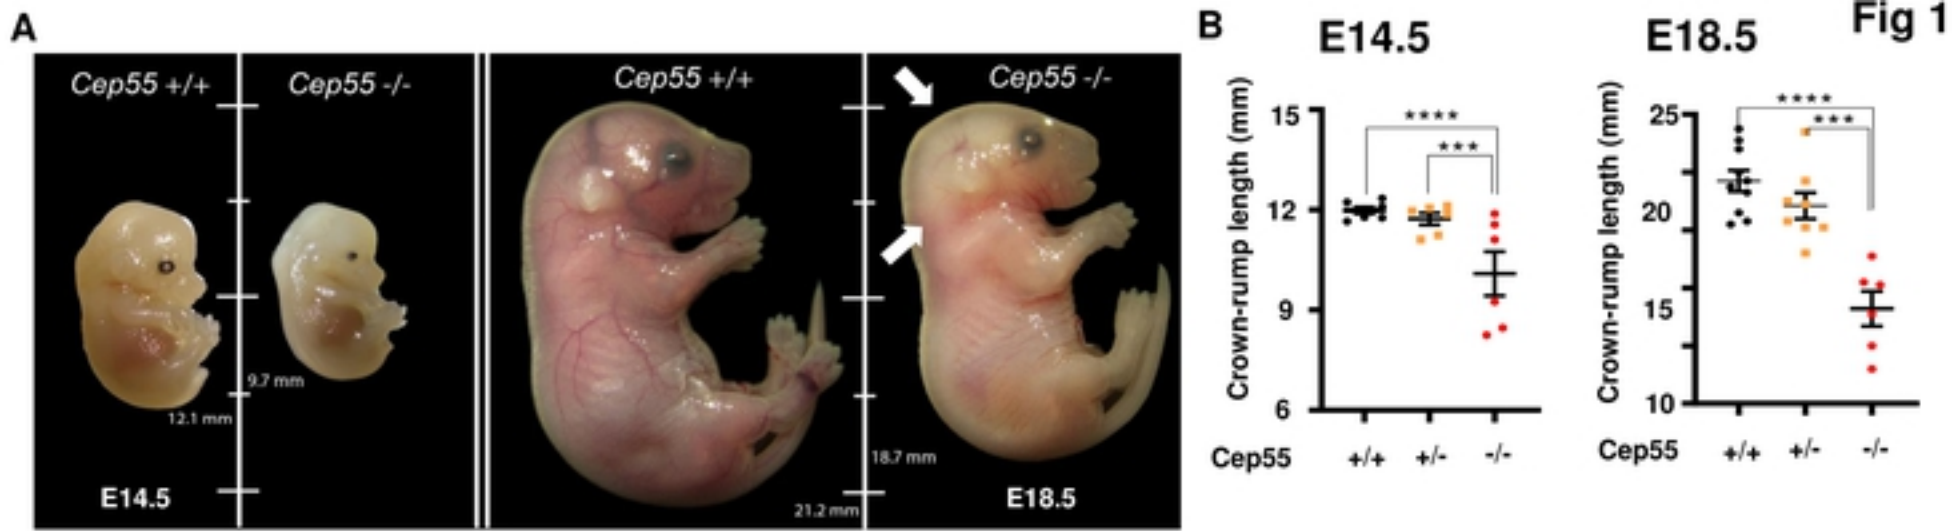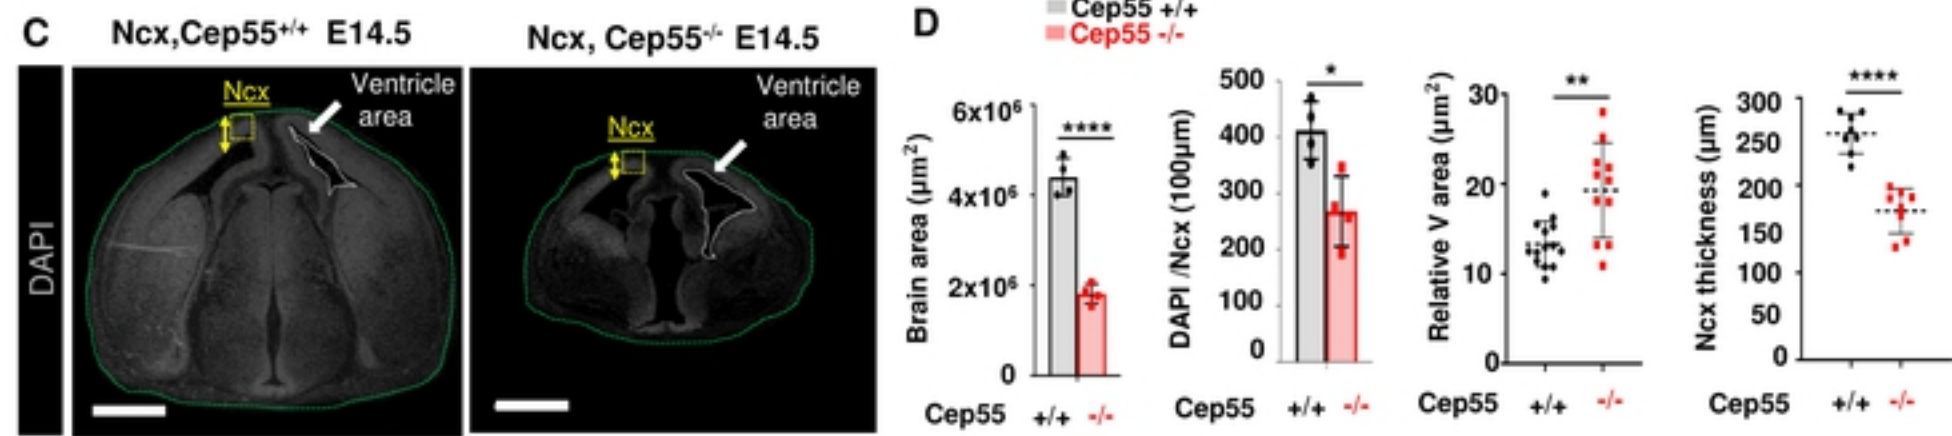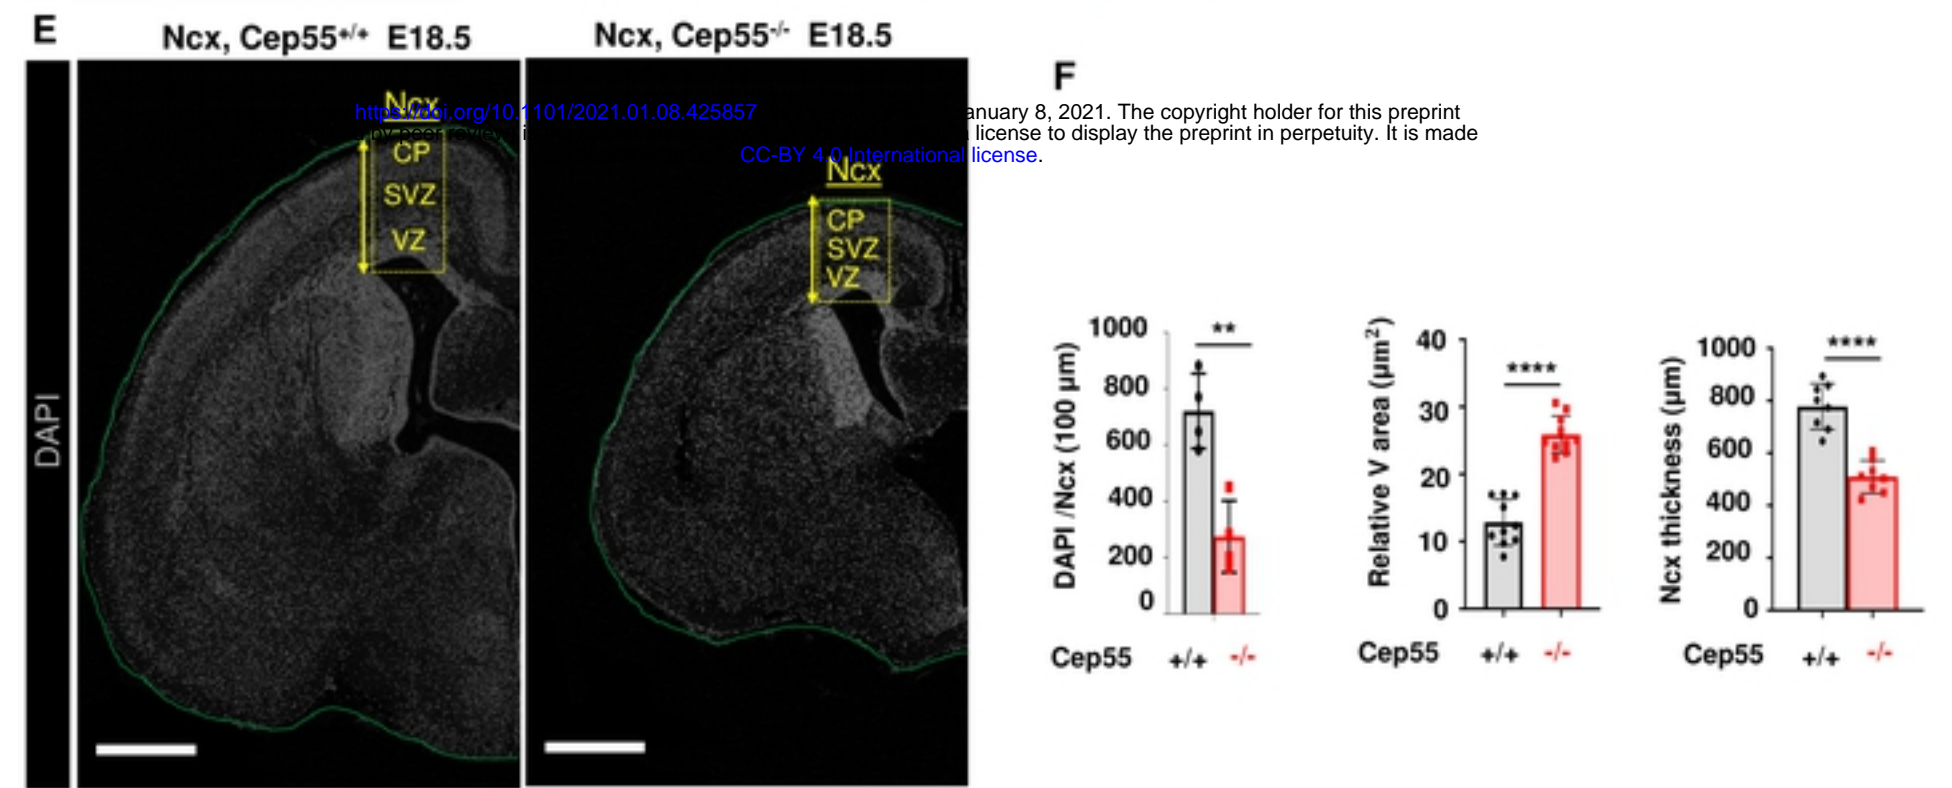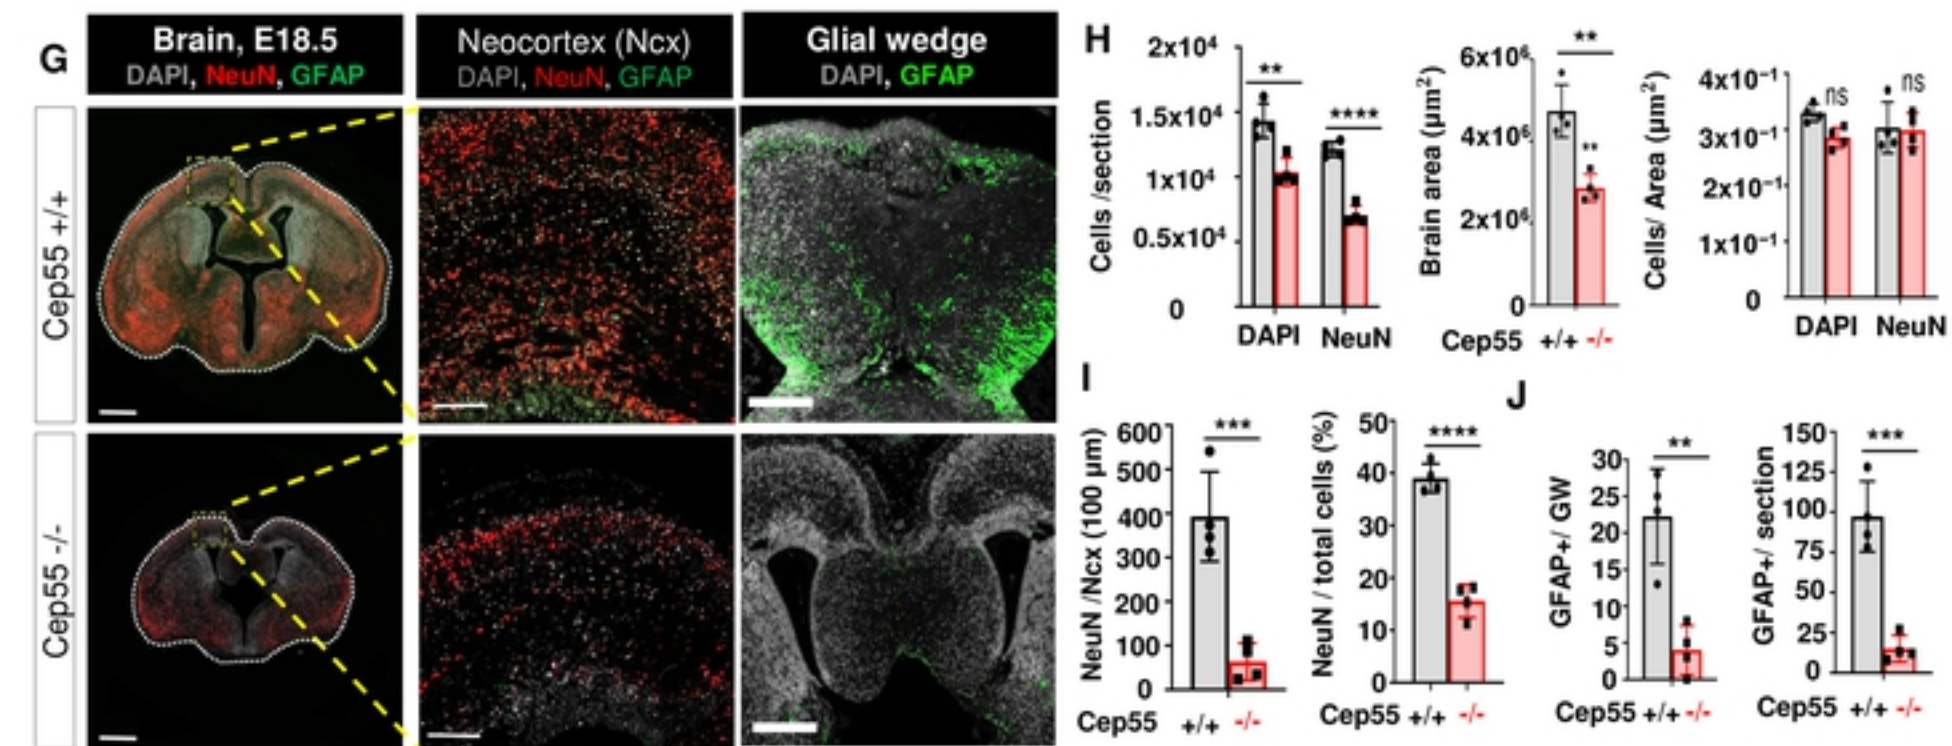

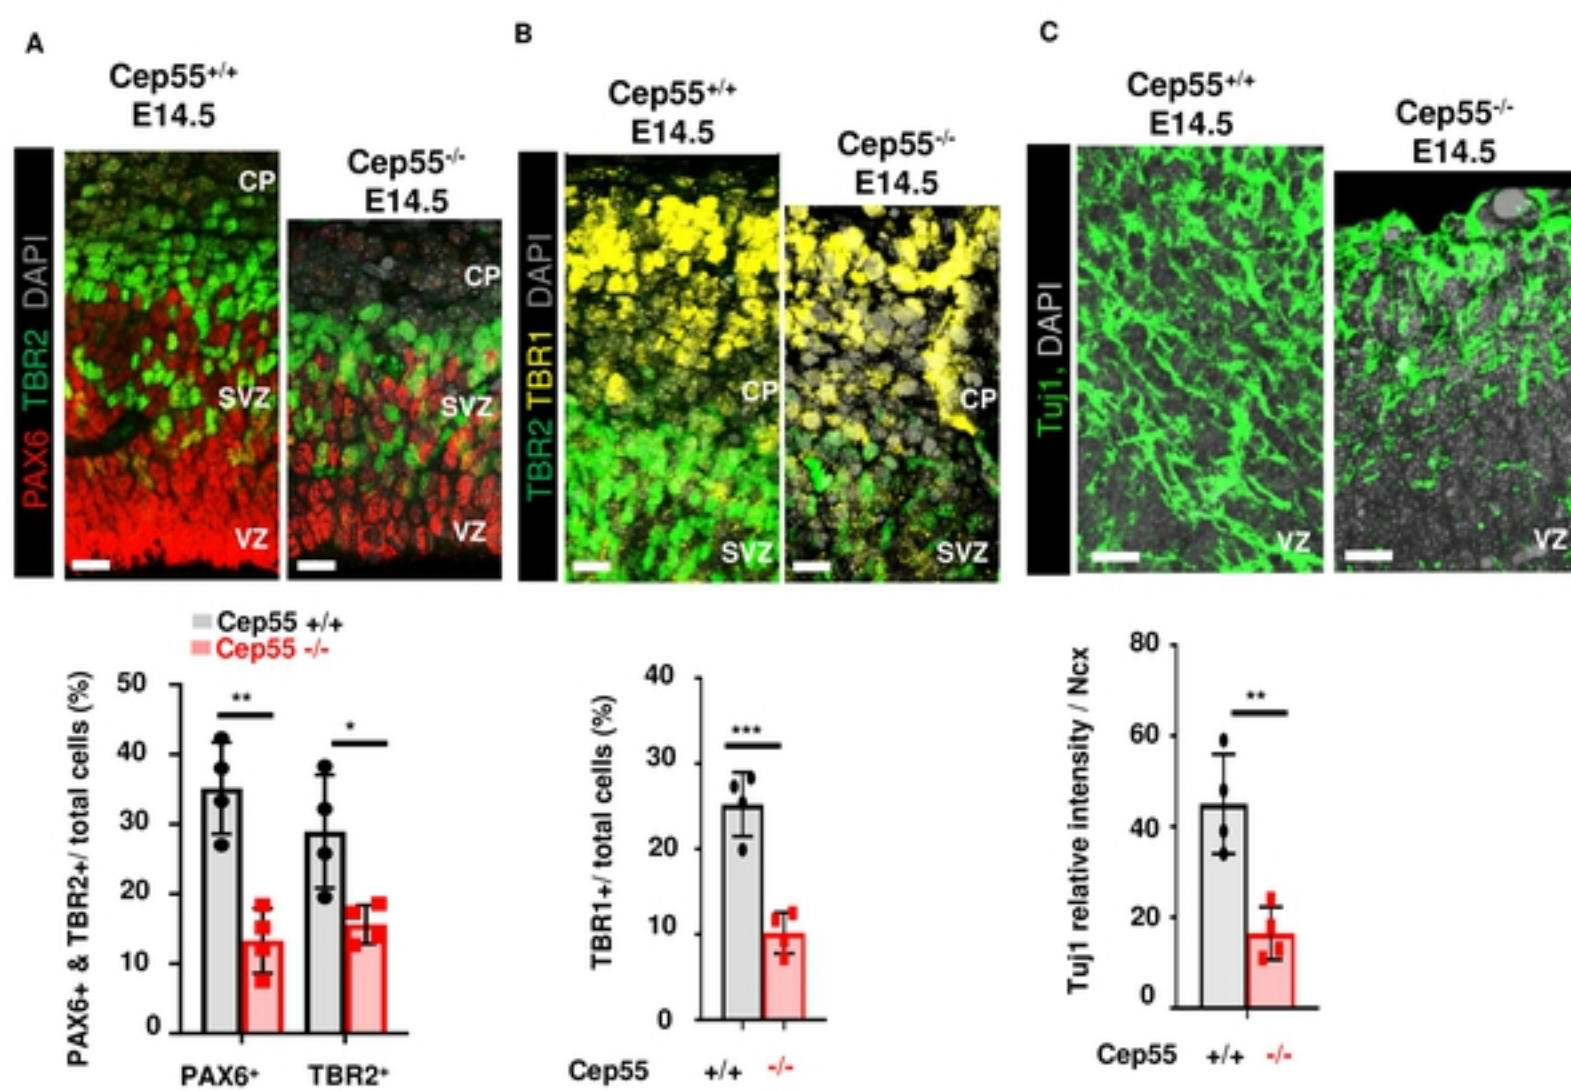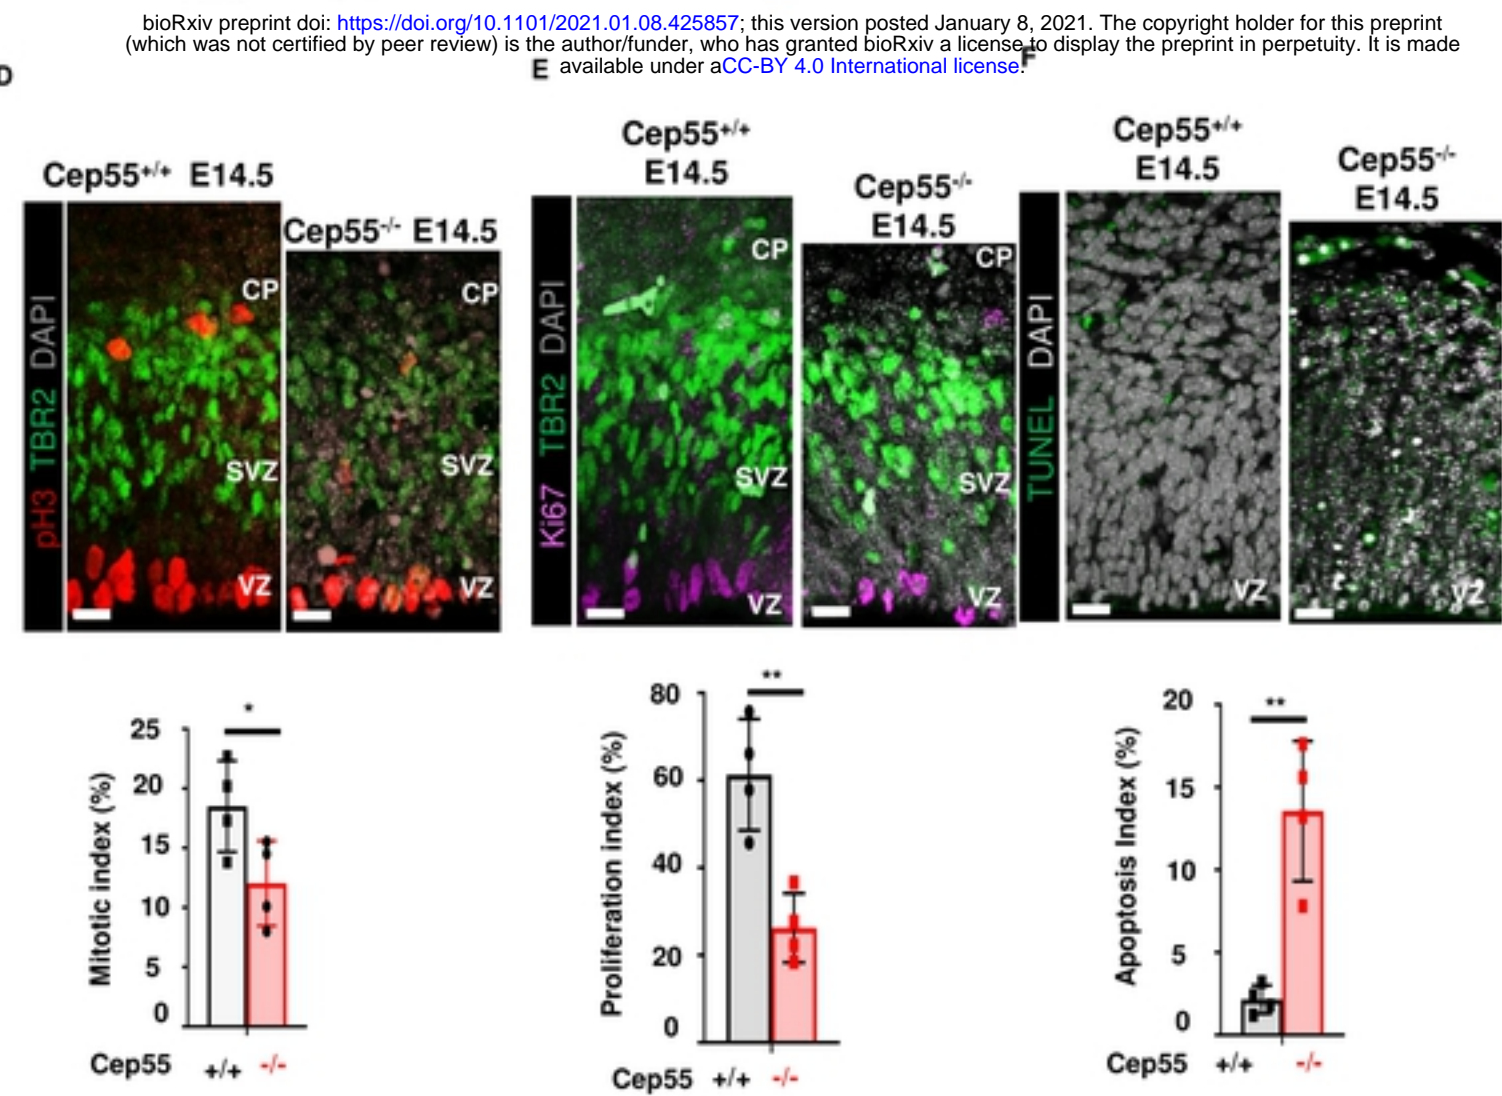

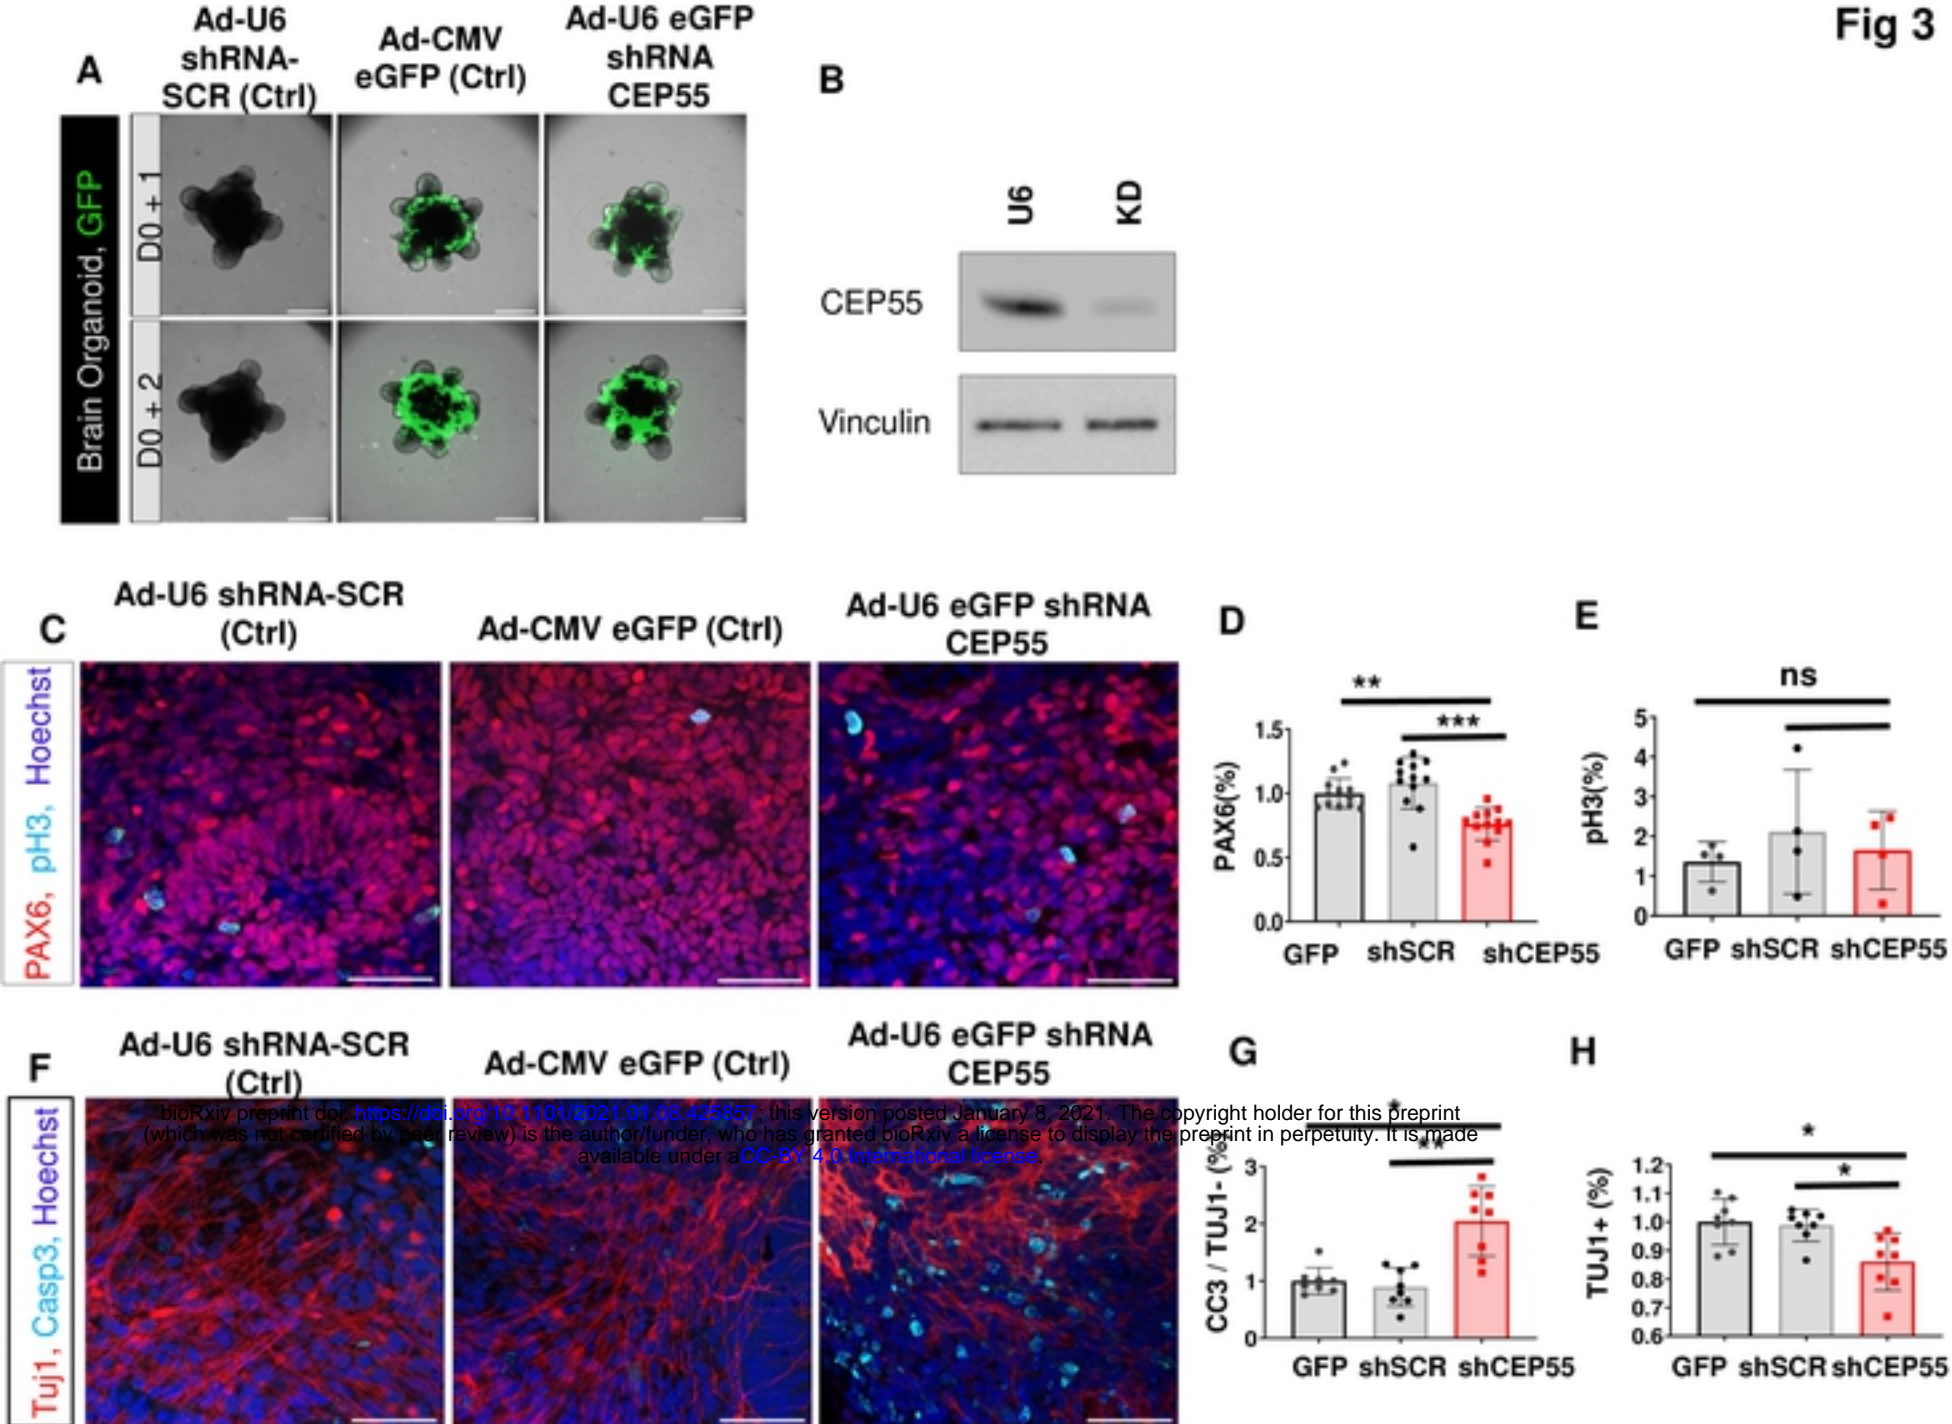

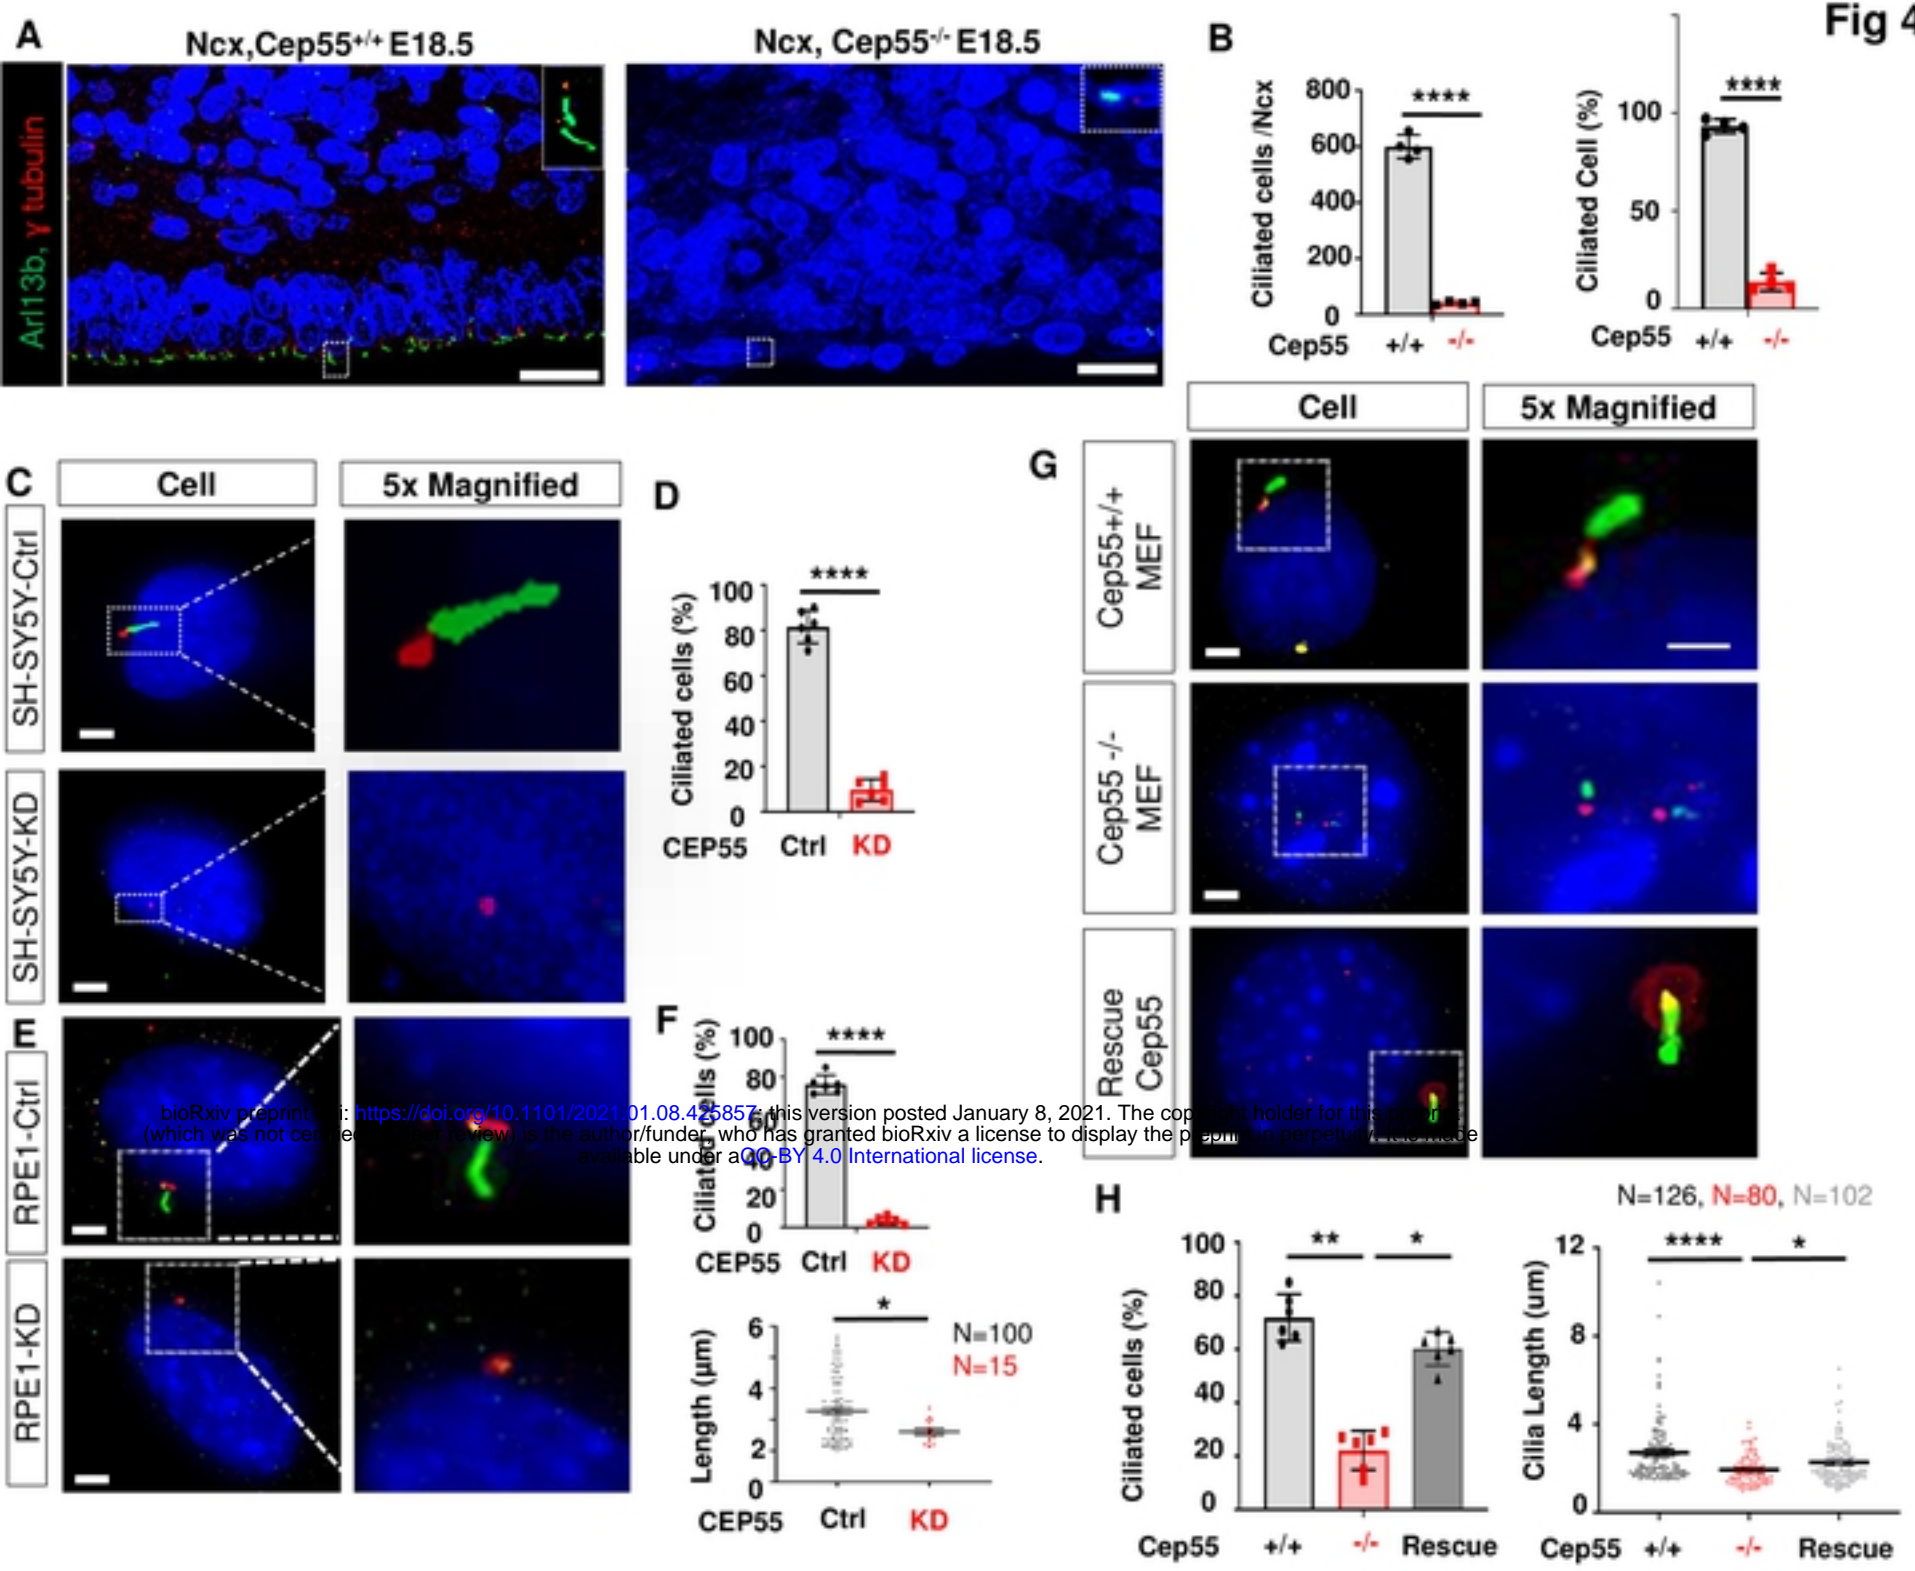

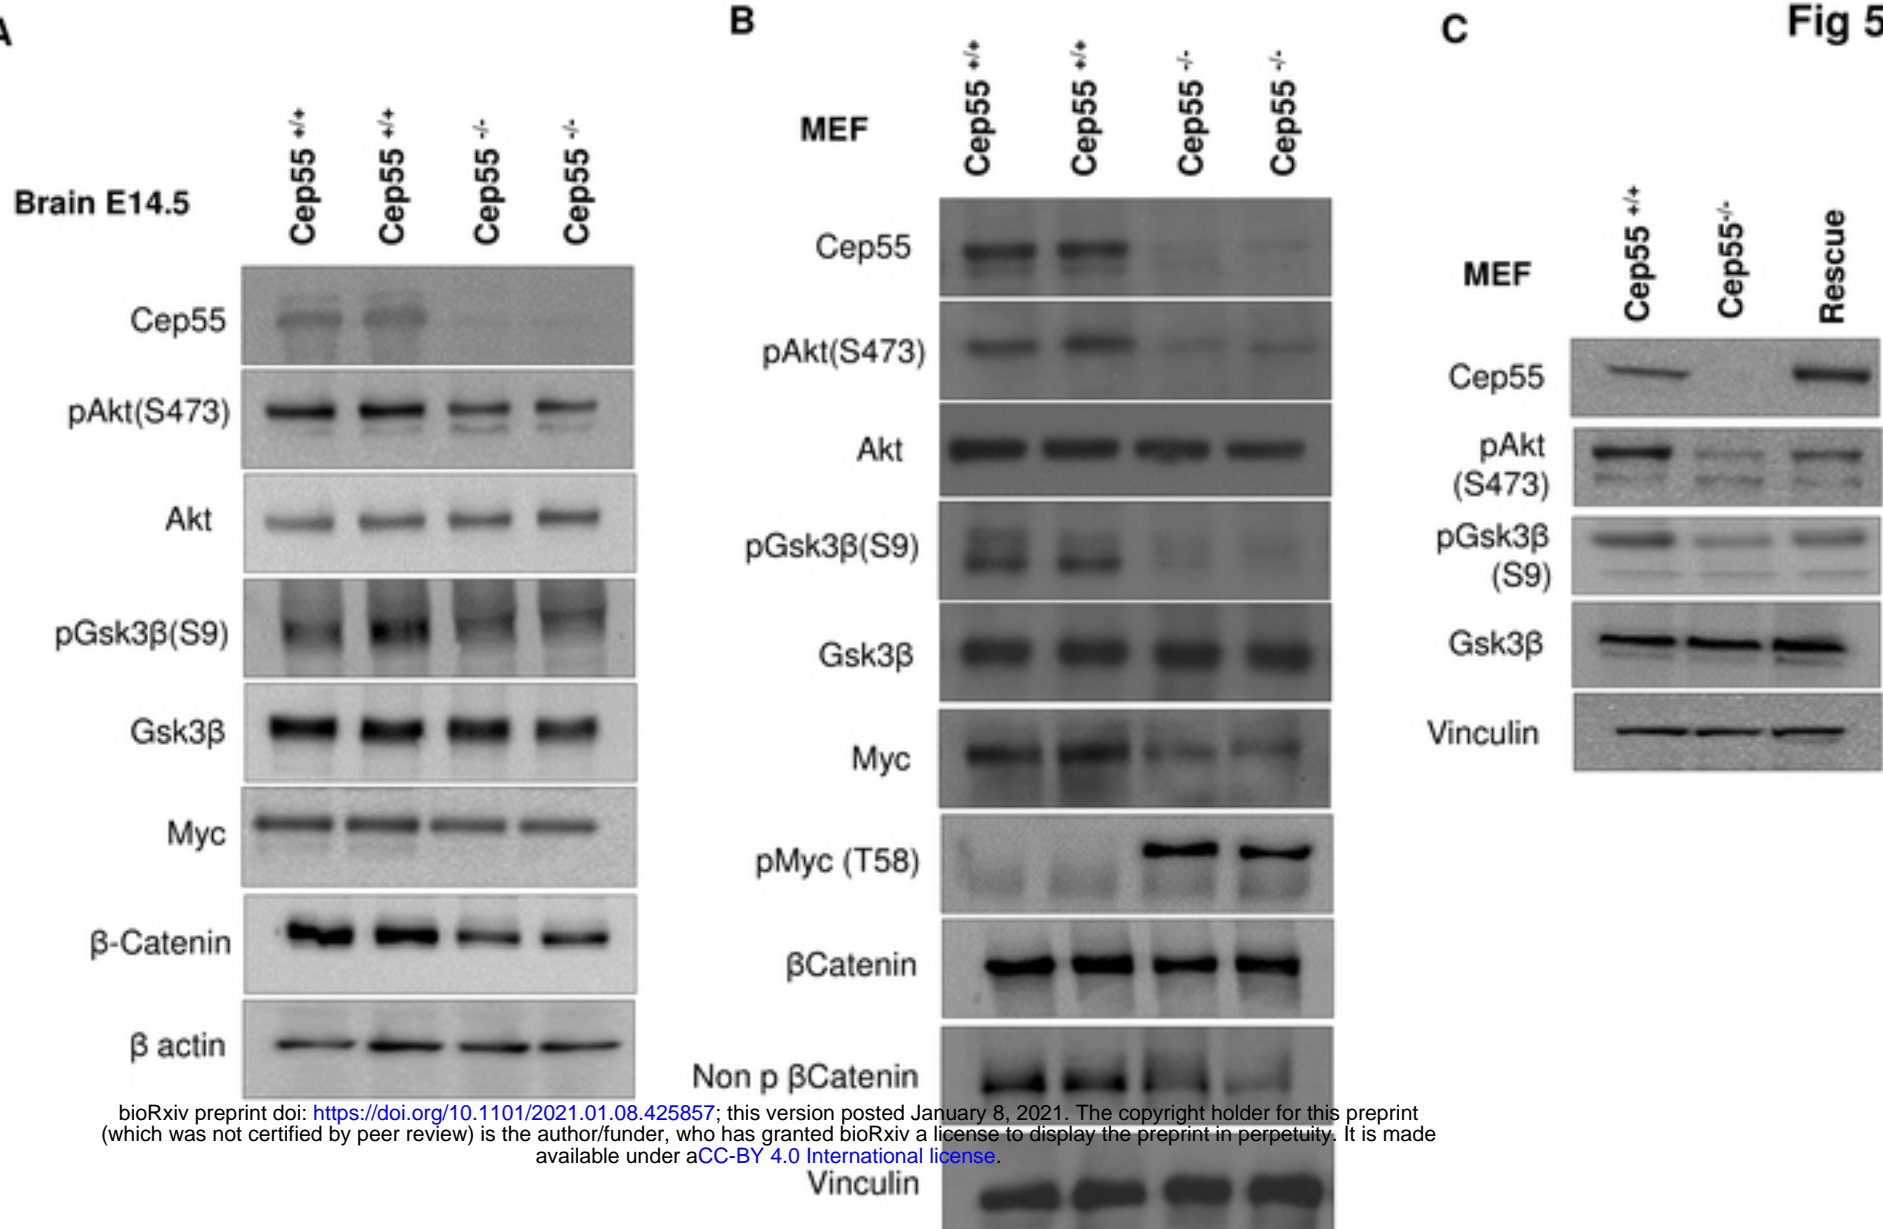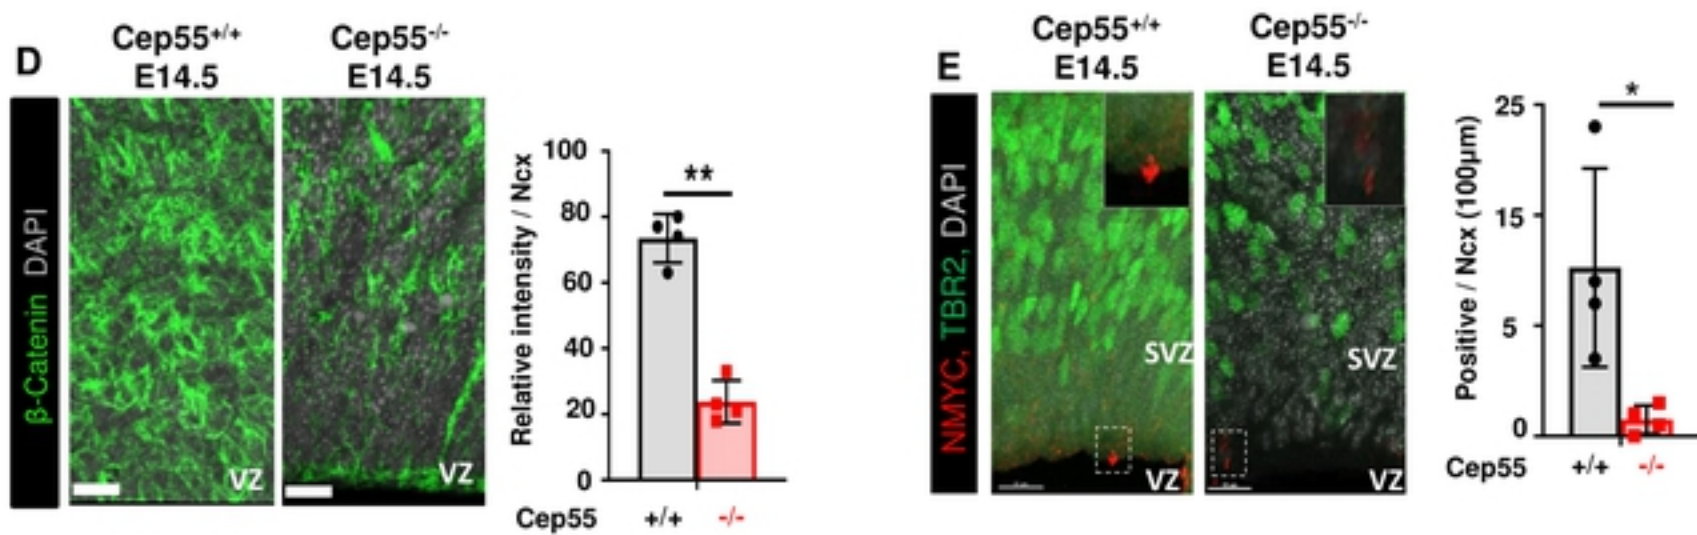

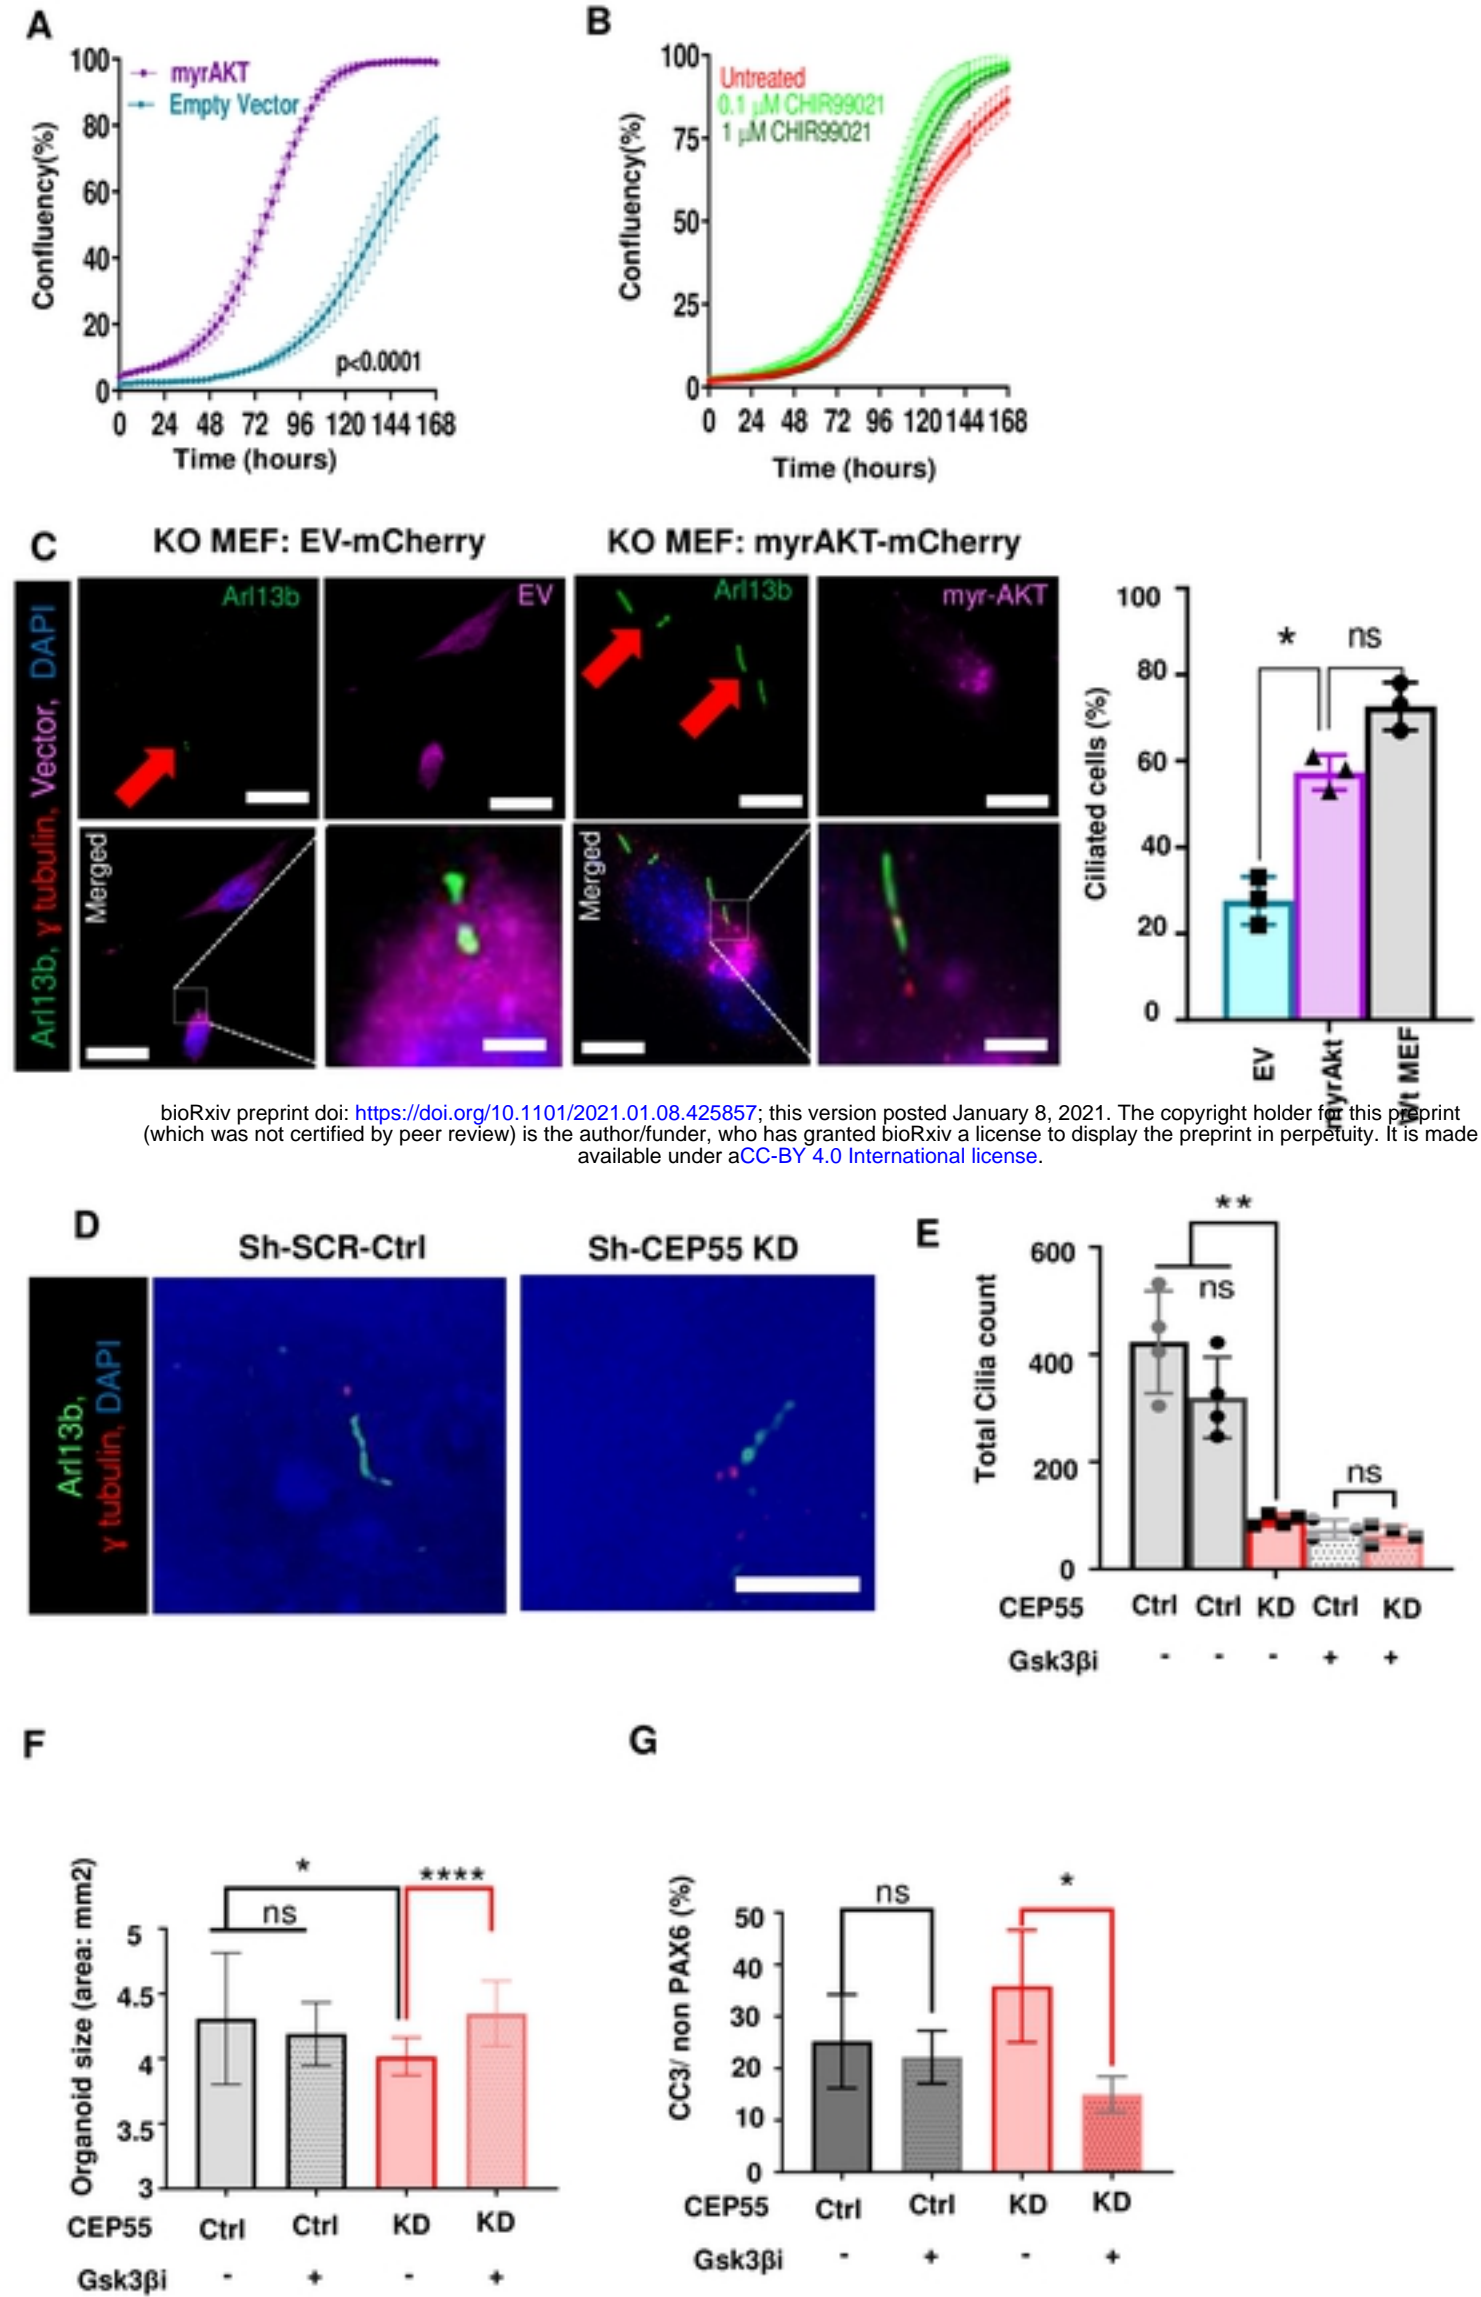

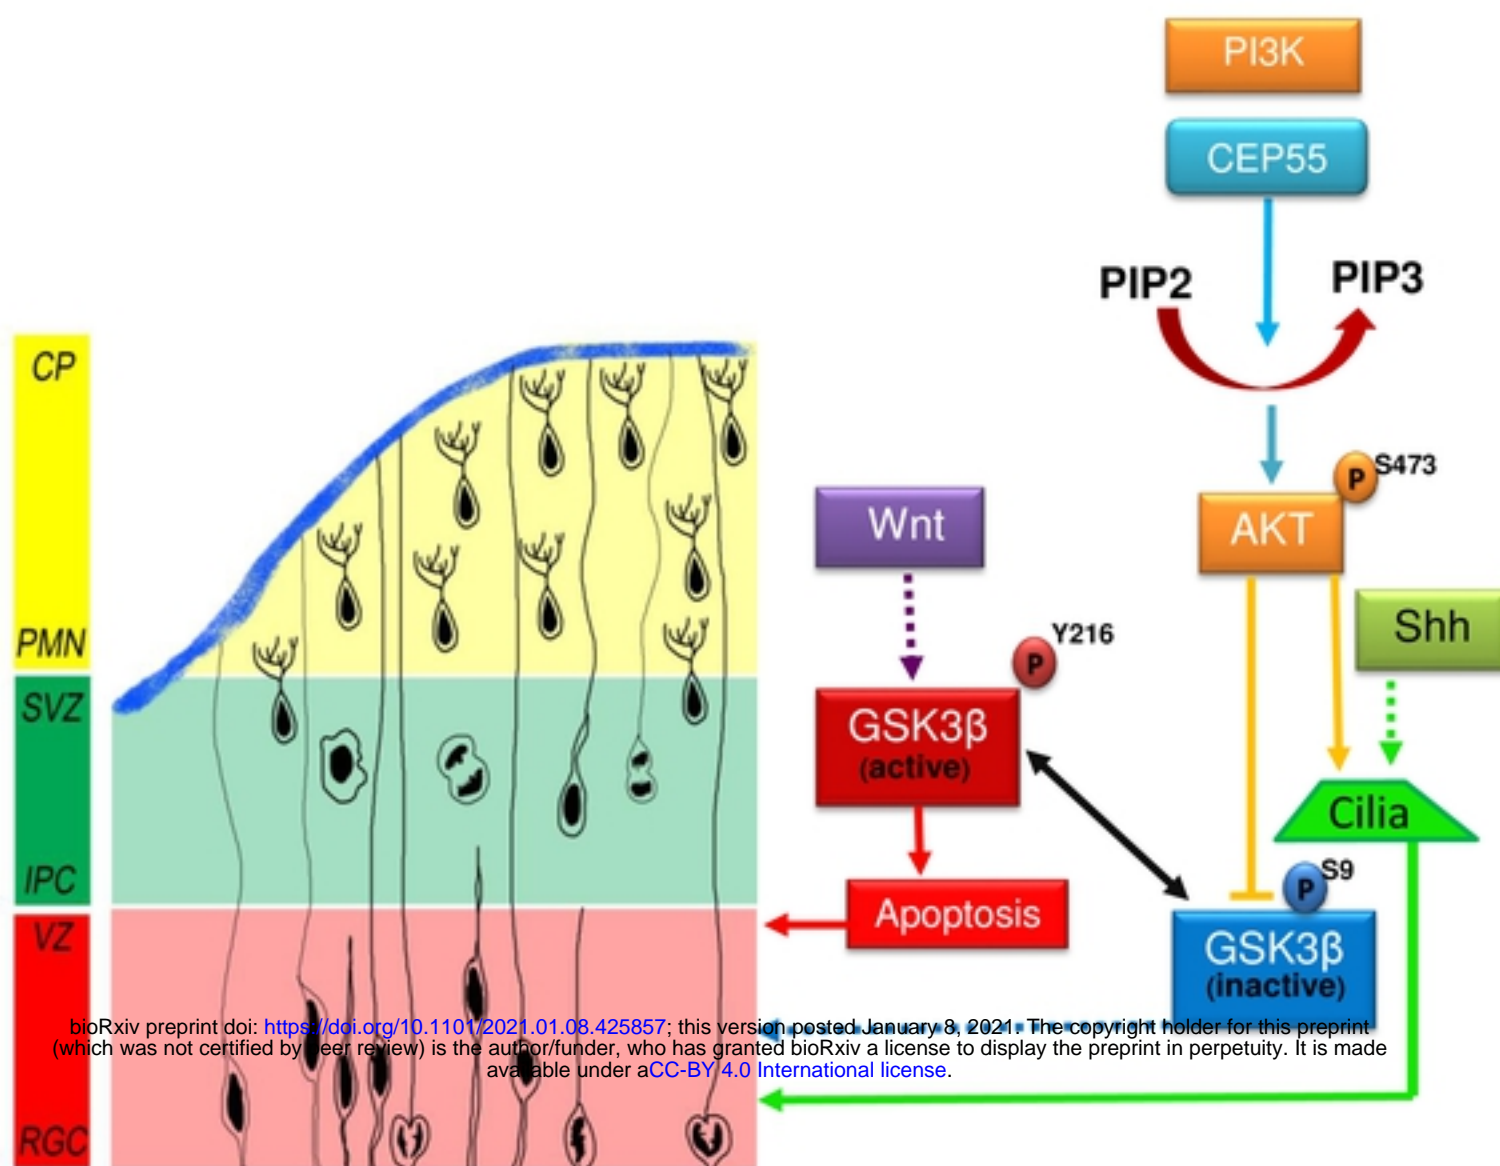

Source: https://biorxiv.org/content/10.1101/2021.01.08.425857v1.full.pdf
